# Supplementary material for: New Inhibitors of Bcr-Abl Based on 2,6,9-Trisubstituted Purine Scaffold Elicit Cytotoxicity in Chronic Myeloid Leukemia-Derived Cell Lines Sensitive and Resistant to TKIs
Source: MDPI journal article supplement (doi:10.3390/pharmaceutics16050649), 2024-05-11

## Supporting Information

### New inhibitors of Bcr-Abl based on 2,6,9-trisubstituted purine scaffold elicited cytotoxicity in chronic myeloid leukaemia-derived cell lines sensitive and resistant to TKIs

Thalia Delgado,<sup>1</sup> Denisa Veselá,<sup>2</sup> Hana Dostálová,<sup>2</sup> Vladimír Kryštof,<sup>2,3\*</sup> Veronika Vojáčková,<sup>2</sup> Radek Jorda,<sup>2</sup> Alejandro Castro,<sup>4</sup> Jeanluc Bertrand,<sup>1</sup> Gildardo Ribera,<sup>5</sup> Mario Faúndez,<sup>6</sup> Miroslav Strnad,<sup>7</sup> Christian Espinosa-Bustos<sup>6</sup> and Cristian O. Salas<sup>1,\*</sup>

1 Departamento de Química Orgánica, Facultad de Química y de Farmacia, Pontificia Universidad Católica de Chile, Santiago de Chile 702843, Chile

2 Department of Experimental Biology, Palacký University Olomouc, Šlechtitelů 27, 783 71 Olomouc, Czech Republic

3 Institute of Molecular and Translational Medicine, Faculty of Medicine and Dentistry, Palacký University Olomouc, Hněvotínská 5, 779 00 Olomouc, Czech Republic

4 Laboratorio de Bioproductos Farmacéuticos y Cosméticos, Centro de Excelencia en Medicina Traslacional, Facultad de Medicina, Universidad de La Frontera, Av. Francisco Salazar 01145, Temuco 4780000, Chile

5 Laboratorio de Biotecnología Farmacéutica, Centro de Biotecnología Genómica, Instituto Politécnico Nacional, Boulevard del Maestro s/n, Reynosa 88710, Mexico

6 Departamento de Farmacia, Facultad de Química y de Farmacia, Pontificia Universidad Católica de Chile, Santiago de Chile 702843, Chile

7 Laboratory of Growth Regulators, Institute of Experimental Botany of the Czech Academy of Sciences & Palacký University, Šlechtitelů 27, 783 71 Olomouc, Czech Republic

## Index

|                                                                                                                                                             |          |
|-------------------------------------------------------------------------------------------------------------------------------------------------------------|----------|
| <sup>1</sup> H, <sup>13</sup> C NMR and <sup>19</sup> F spectra of final compounds.....                                                                     | 2-19     |
| HRMS of final compounds.....                                                                                                                                | 20-26    |
| <b>Table S1.</b> Binding affinity scores of the purine derivatives in the Bcr-Abl <sup>WT</sup> .....                                                       | pag 27   |
| <b>Figure S1.</b> Co-crystallized ligand, purvalanol, in the Bcr-Abl binding site.....                                                                      | pag 28   |
| <b>Figure S2.</b> Correlation plot between biological activity in pIC <sub>50</sub> and affinity energies of the synthesised compounds.....                 | pag 29   |
| <b>Figure S3.</b> Correlation plot between biological activity in pGI <sub>50</sub> values on B8 cells and affinity energies of the selected compounds..... | pag30    |
| <b>Figure S4.</b> Histograms of flow cytometry of selected compounds on KCL cells and their subclones.....                                                  | pag31-33 |

$^1\text{H}$  NMR spectra of compound **7a**

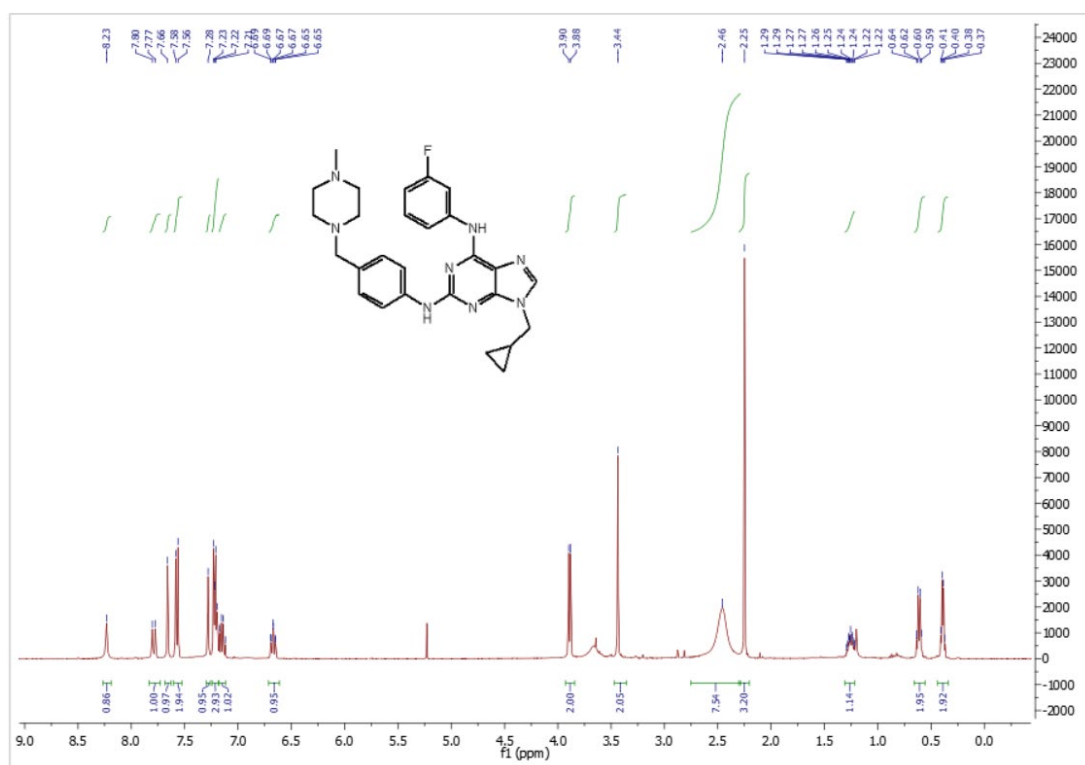

$^{13}\text{C}$  NMR spectra of compound **7a**

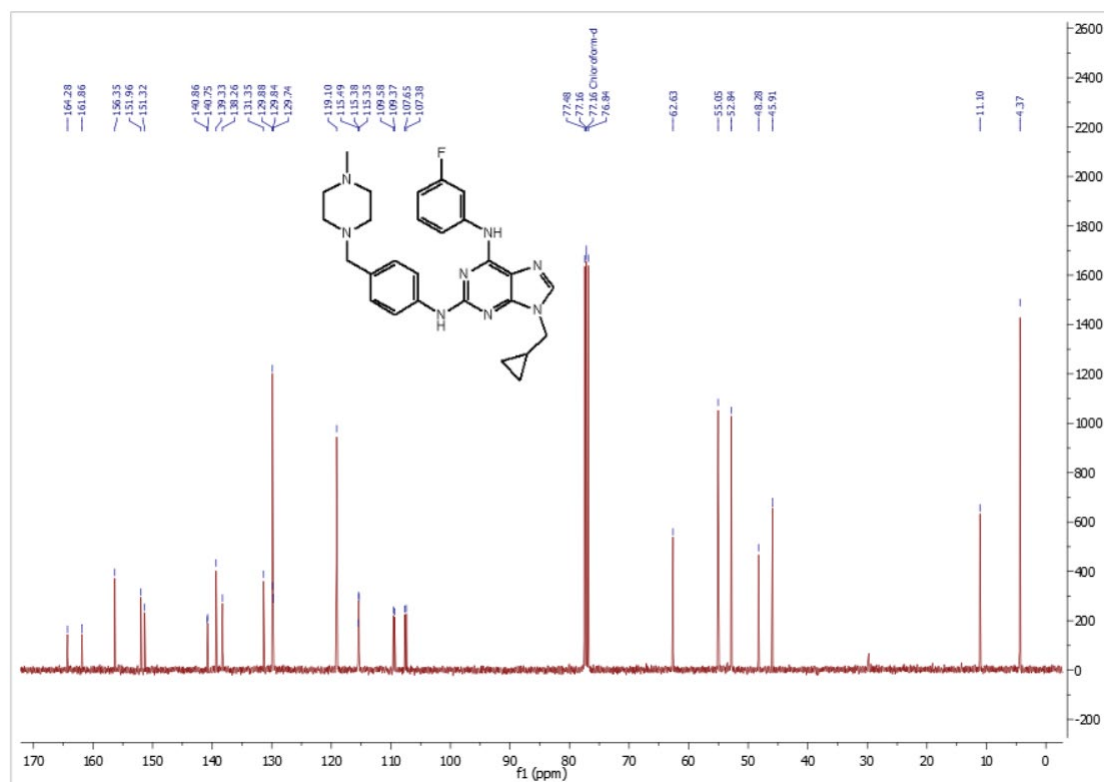

$^{19}\text{F}$  NMR spectra of compound **7a**

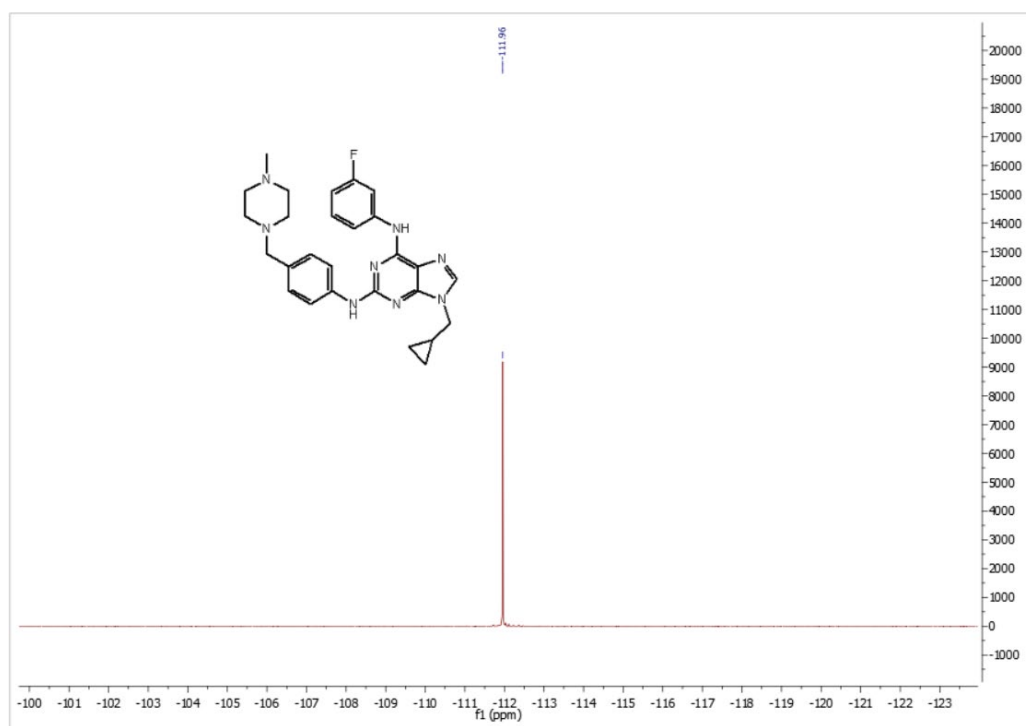

$^1\text{H}$  NMR spectra of compound **7b**

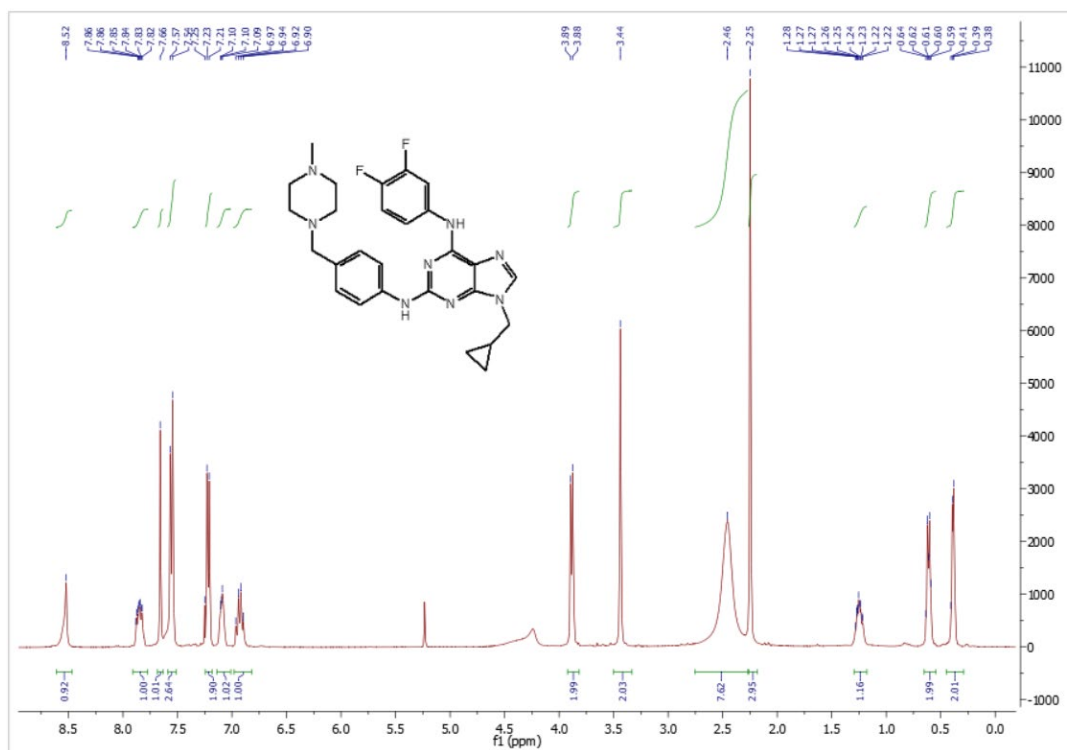

$^{13}\text{C}$  NMR spectra of compound **7b**

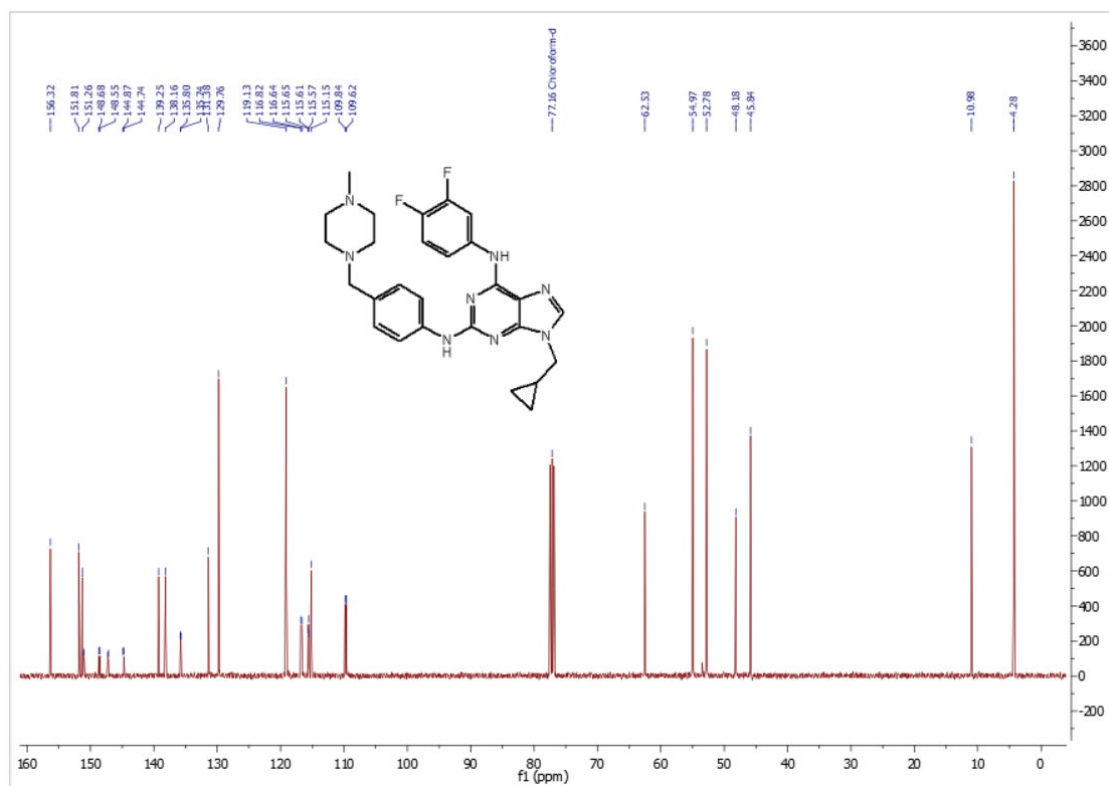

$^{19}\text{F}$  NMR spectra of compound **7b**

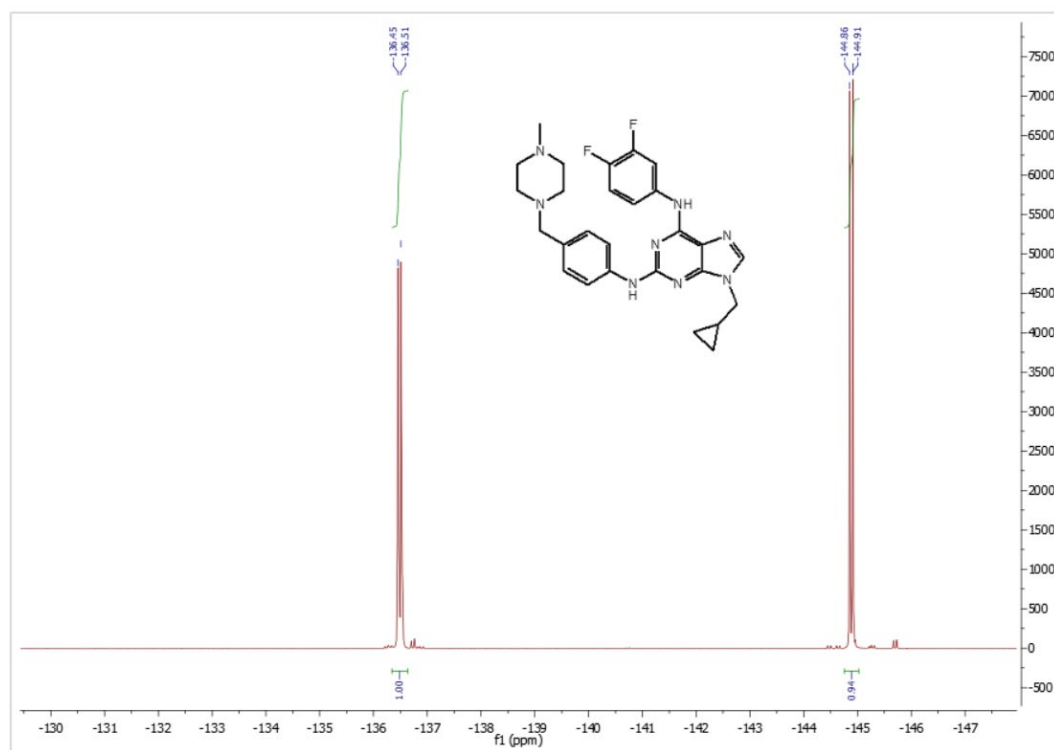

# <sup>1</sup>H NMR spectra of compound **11a**

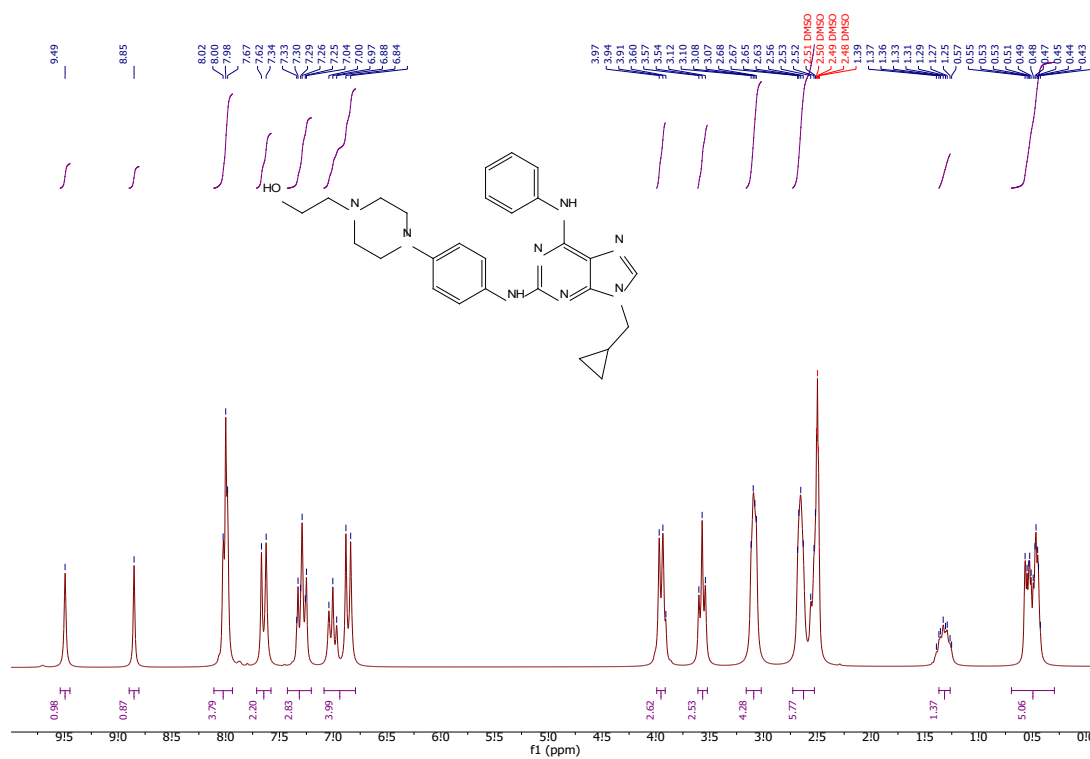

# <sup>13</sup>C NMR spectra of compound **11a**

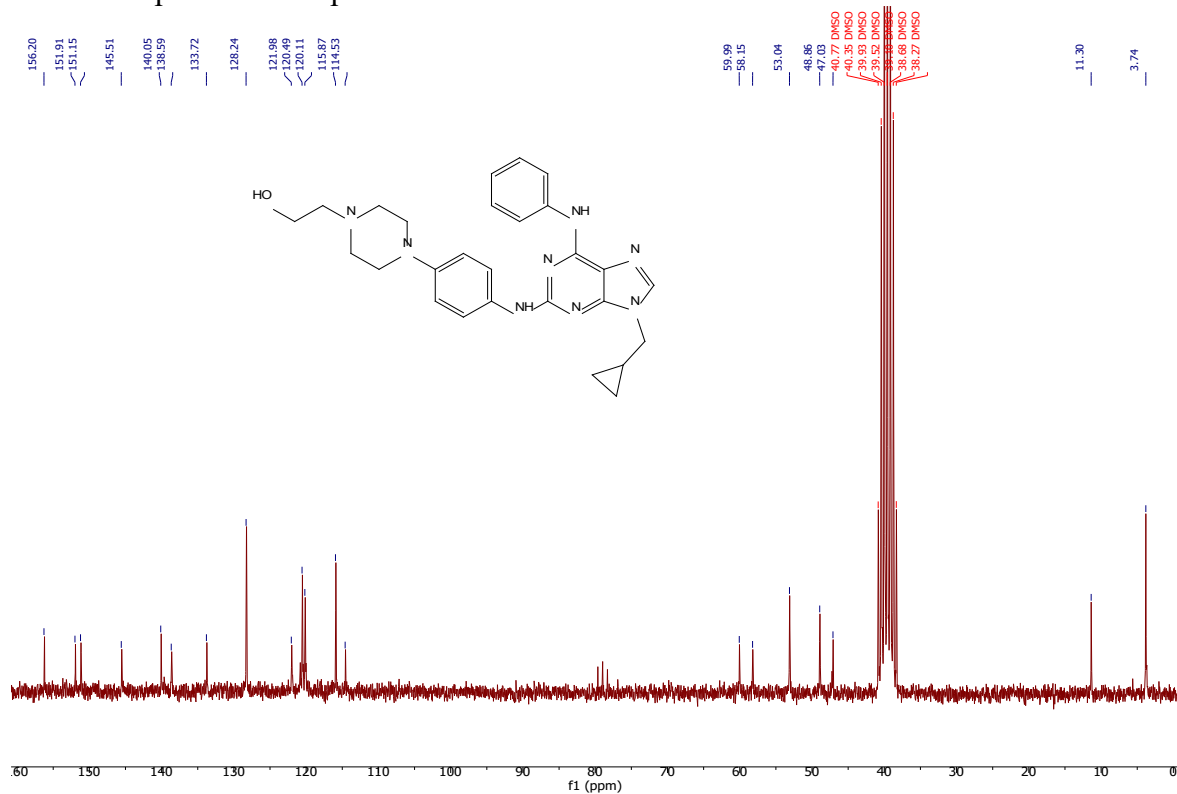

# <sup>1</sup>H NMR spectra of compound **11b**

JL.Bertrand-JL-346.1.fid

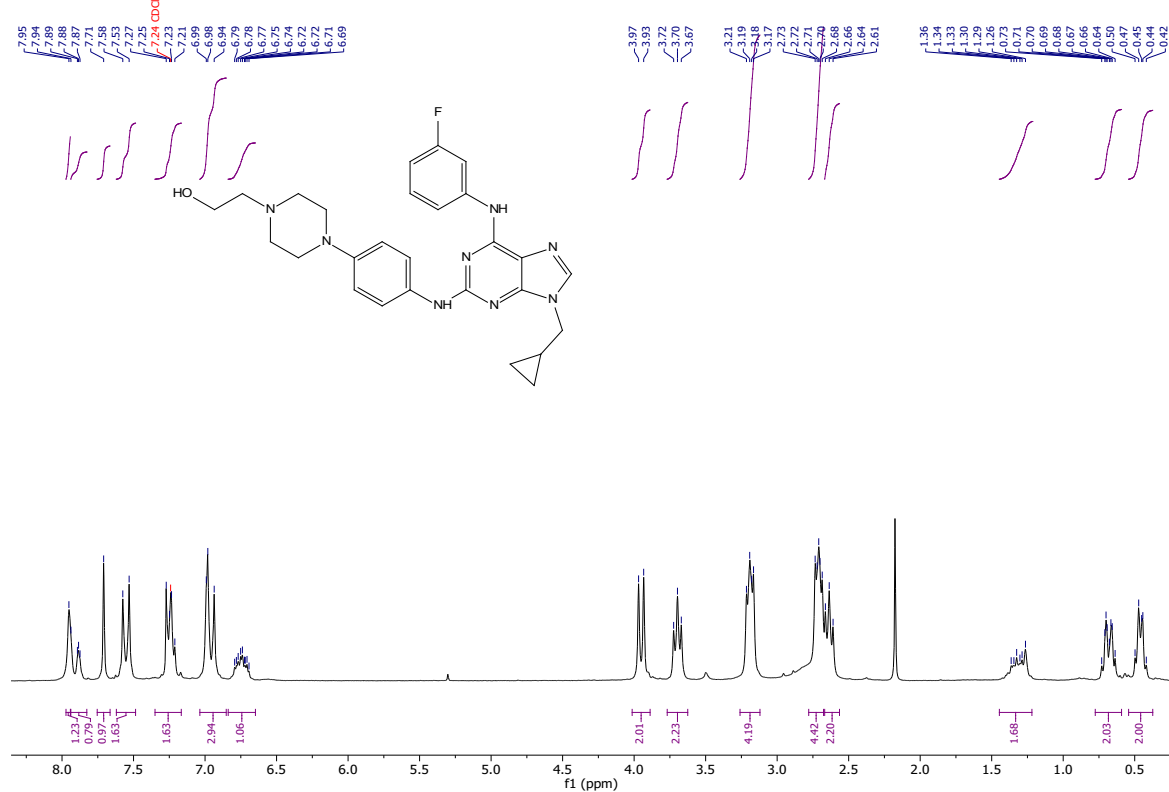

## <sup>13</sup>C NMR spectra of compound **11b**

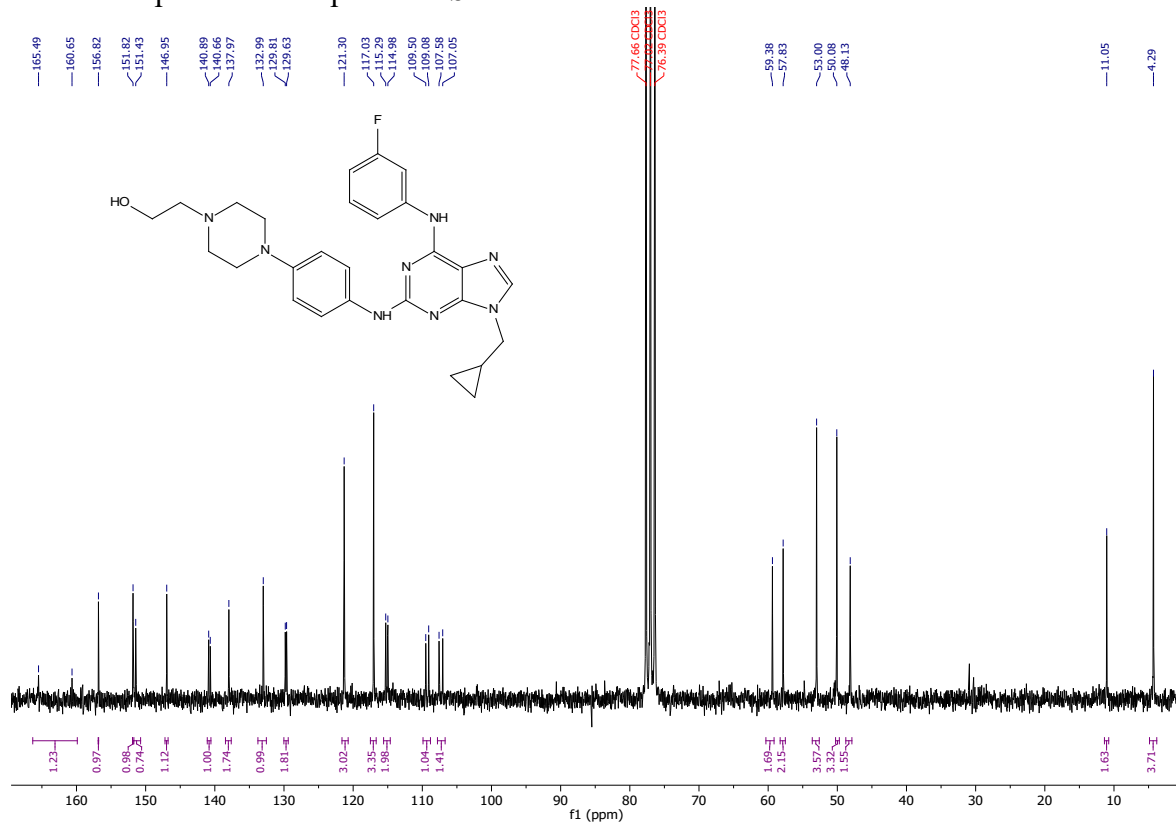

$^{19}\text{F}$  NMR spectra of compound **11b**

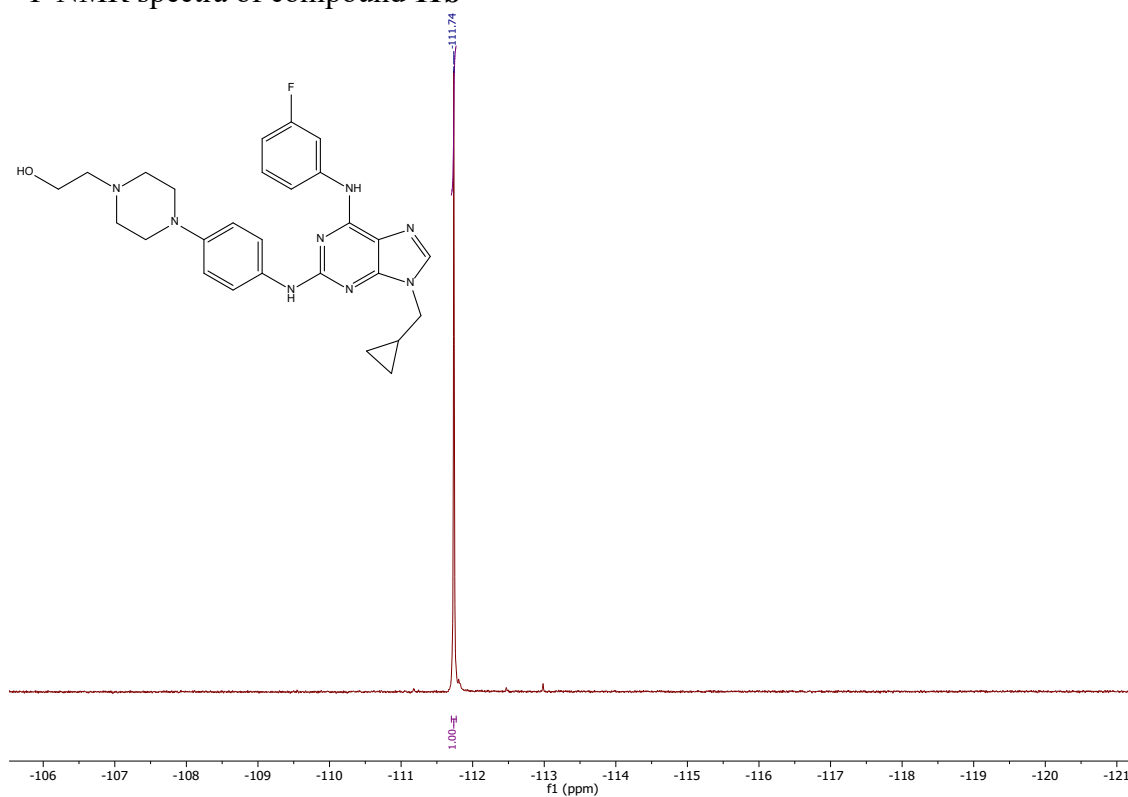

$^1\text{H}$  NMR spectra of compound **11c**

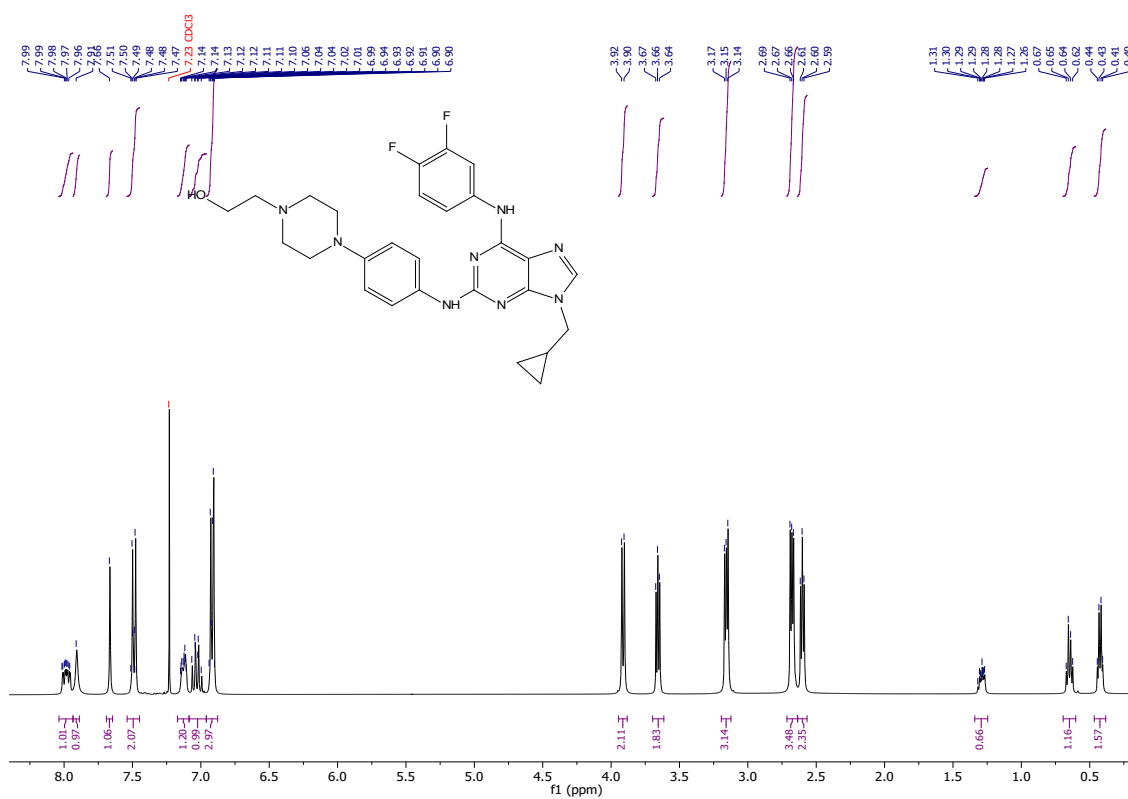

Chemical structure of compound 11c is shown above the corresponding <sup>13</sup>C NMR spectrum (Figure S10). The spectrum displays peaks in the aromatic region (100-160 ppm) and aliphatic region (4-60 ppm). Key peaks are labeled with their chemical shifts (ppm): 158.33, 156.86, 151.73, 151.46, 148.94, 147.06, 138.00, 135.85, 135.62, 135.76, 135.75, 132.89, 121.46, 117.00, 116.44, 115.84, 115.24, 115.22, 115.19, 115.09, 114.95, 109.51, 77.35 (CDCl<sub>3</sub>), 76.71 (CDCl<sub>3</sub>), 59.39, 57.83, 53.00, 50.04, 48.16, 11.06, and 4.30.

Chemical structure of the compound is shown above the spectrum. The structure is a complex molecule featuring a central benzimidazole core. It includes a 4-(2-hydroxyethyl)piperidin-1-yl group, a 2,6-difluorophenyl group, and a 2-(cyclopropylmethyl) group. The spectrum displays two main signals: a sharp peak at approximately 136 ppm (labeled 136.10 and 136.16) and a sharp peak at approximately 145 ppm (labeled 144.98 and 145.04). The x-axis is labeled 'f1 (ppm)' and ranges from -133 to -149.



# <sup>1</sup>H NMR spectra of compound **11d**

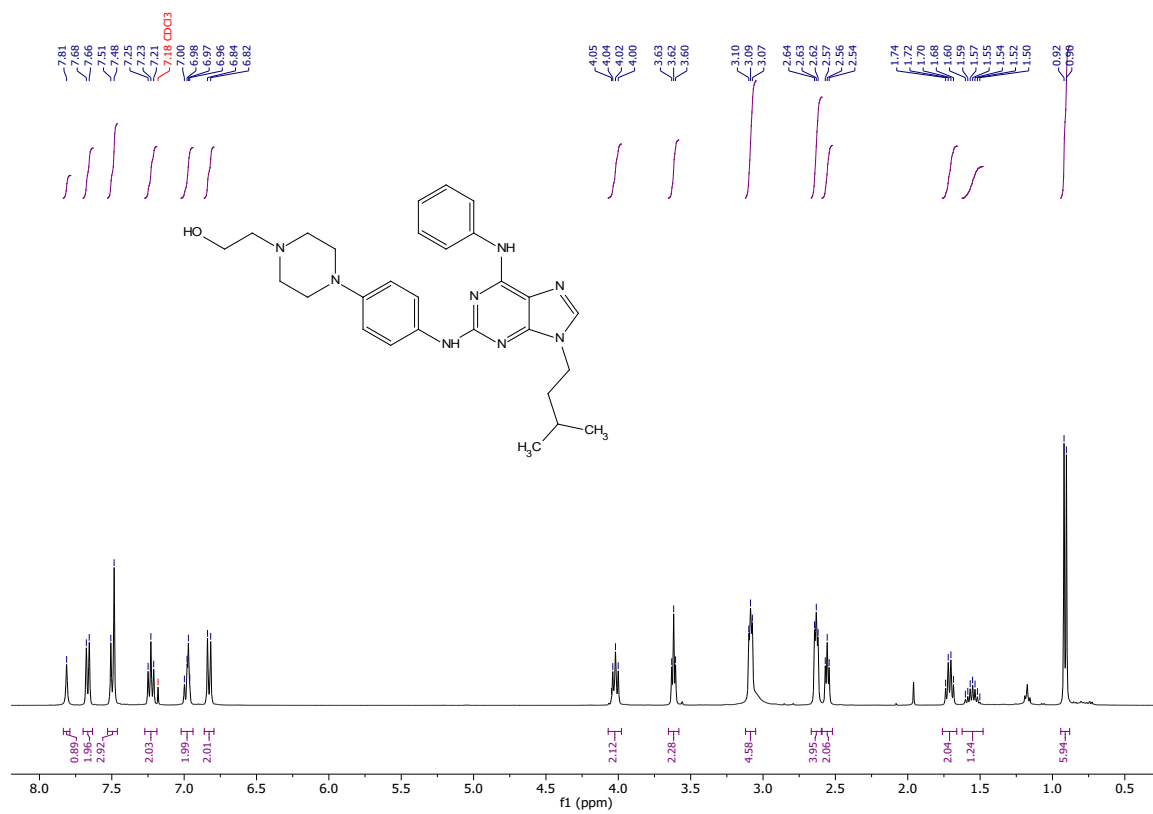

## <sup>13</sup>C NMR spectra of compound **11d**

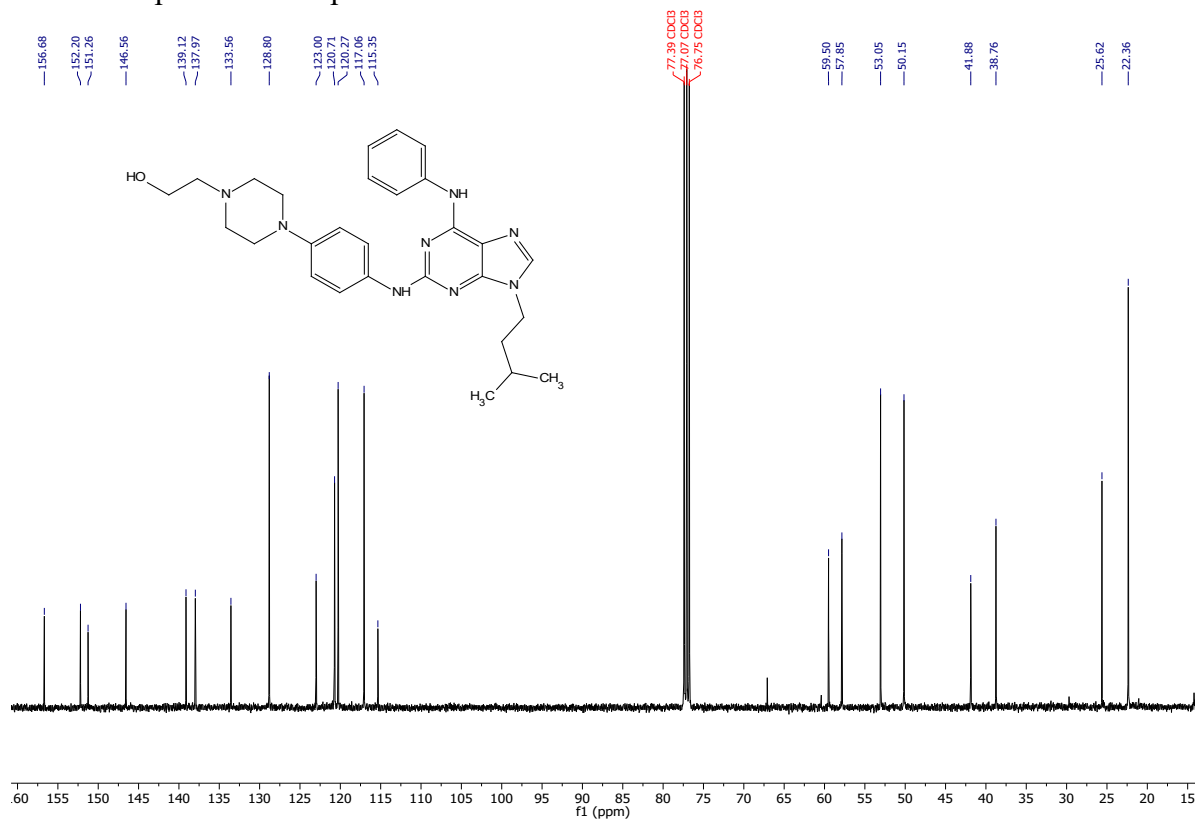

# <sup>1</sup>H NMR spectra of compound 11e

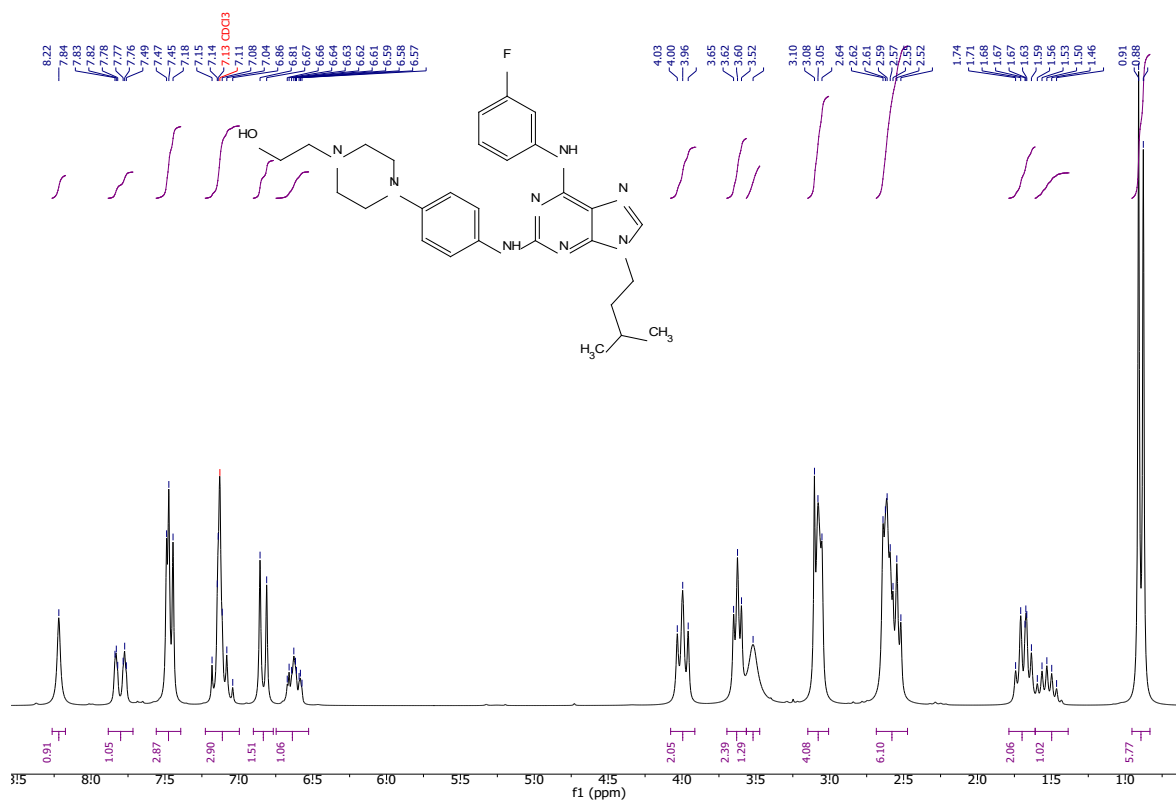

## <sup>13</sup>C NMR spectra of compound 11e

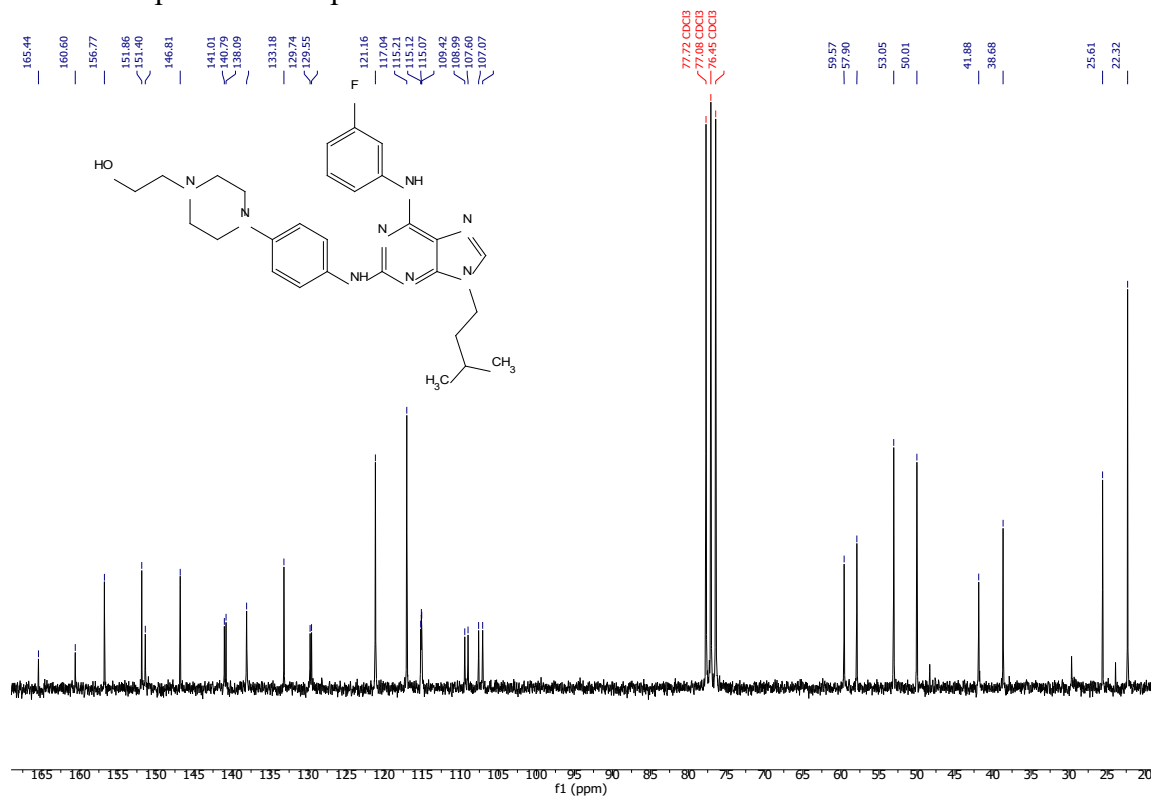

$^{19}\text{F}$  NMR spectra of compound **11e**

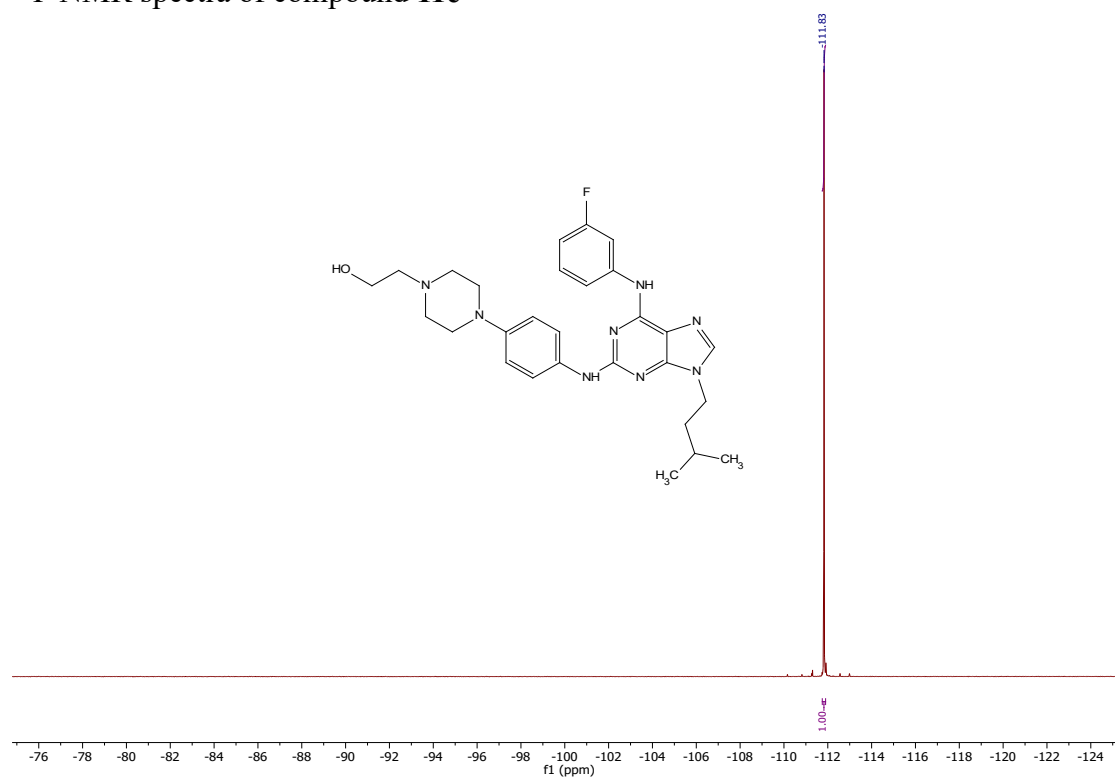

$^1\text{H}$  NMR spectra of compound **11f**

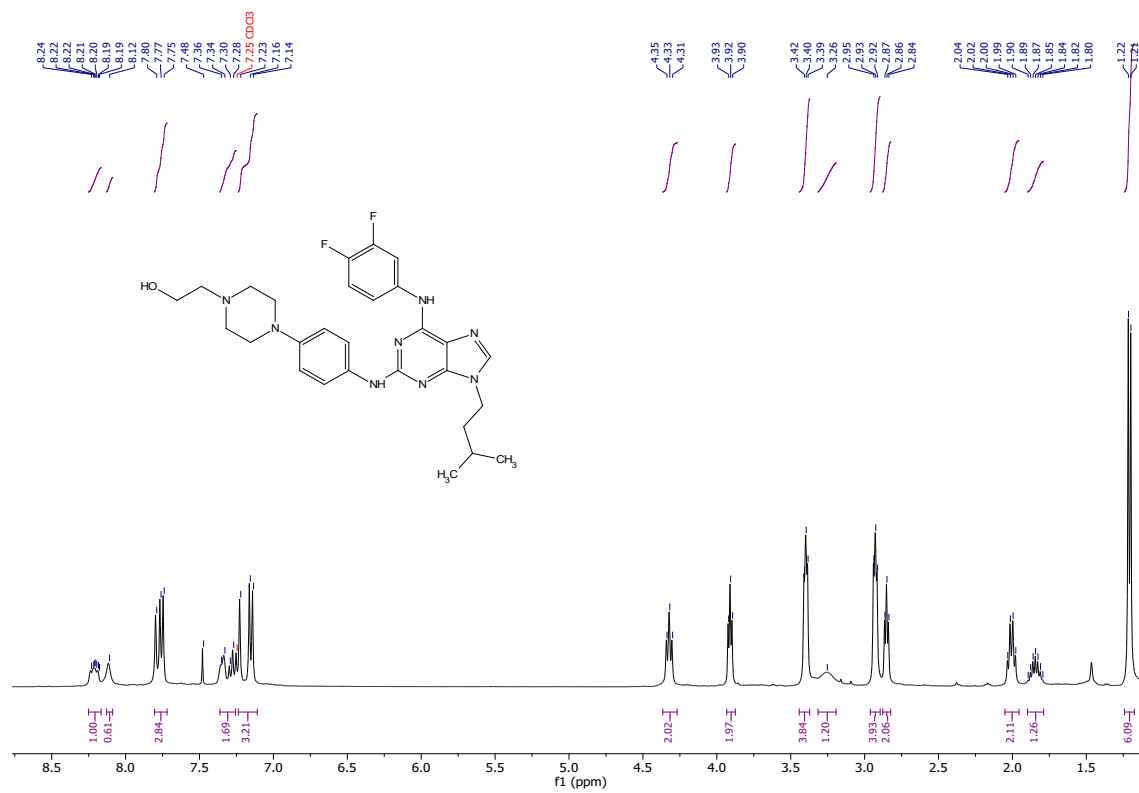

<sup>13</sup>C NMR spectra of compound **11f**

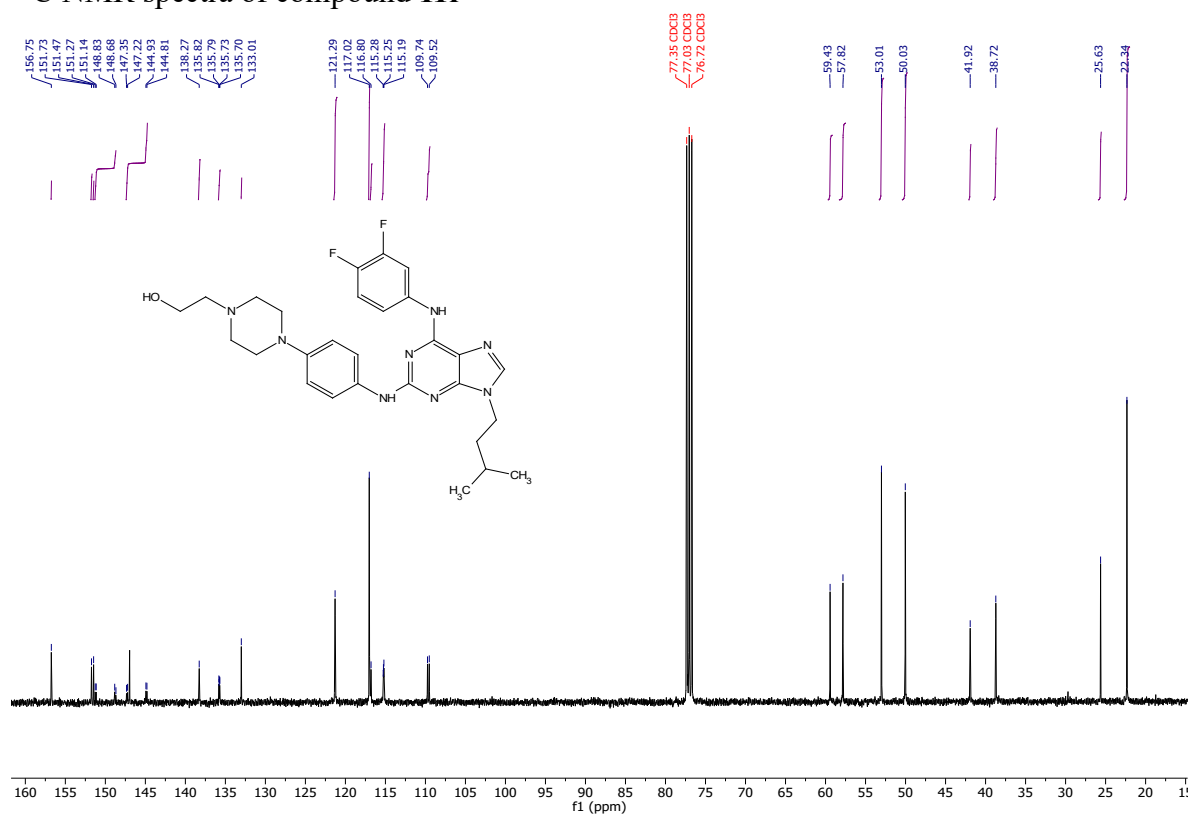

<sup>19</sup>F NMR spectra of compound **11f**

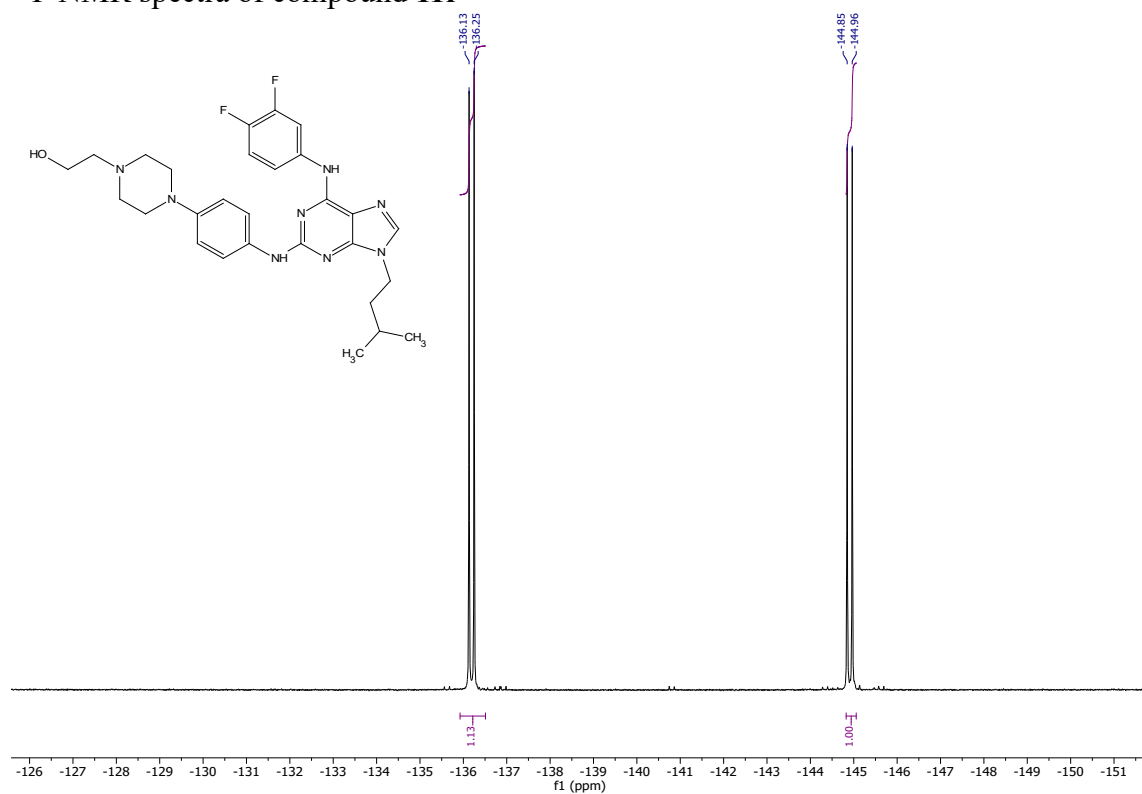

# <sup>1</sup>H NMR spectra of compound **11g**

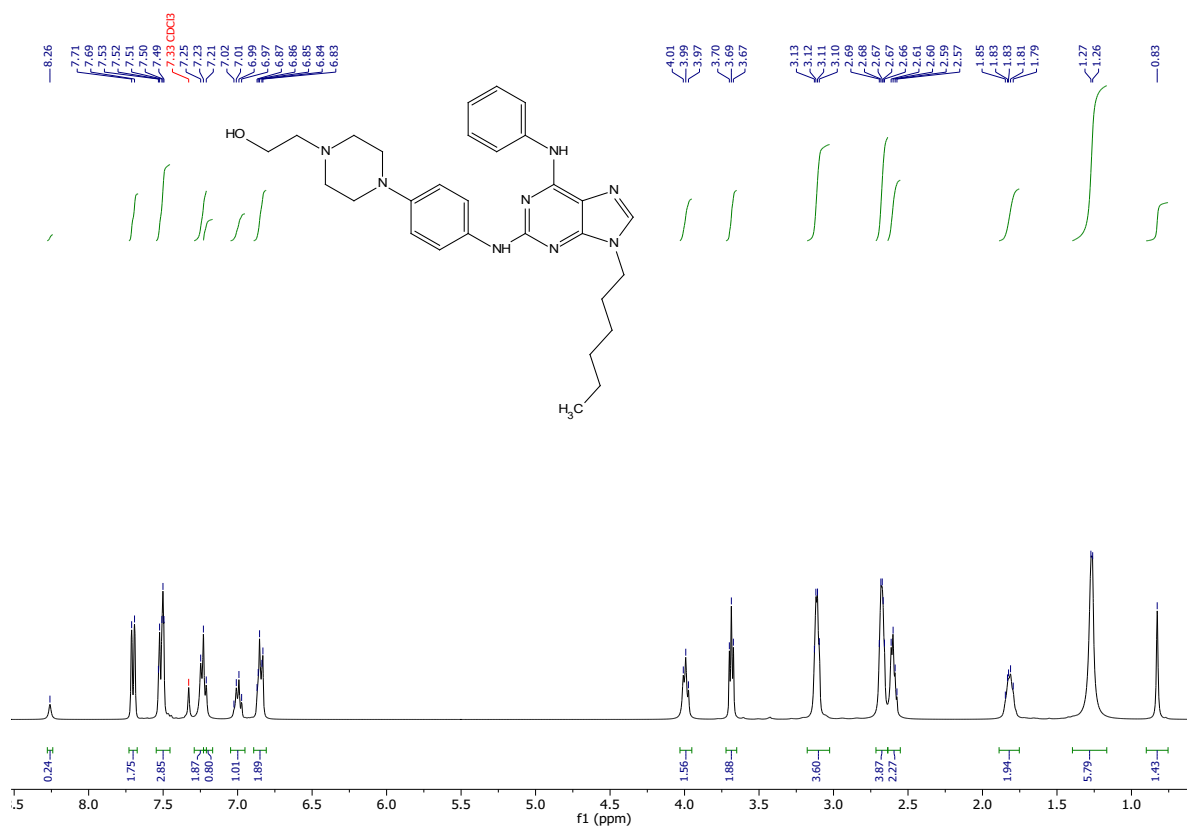

# <sup>13</sup>C NMR spectra of compound **11g**

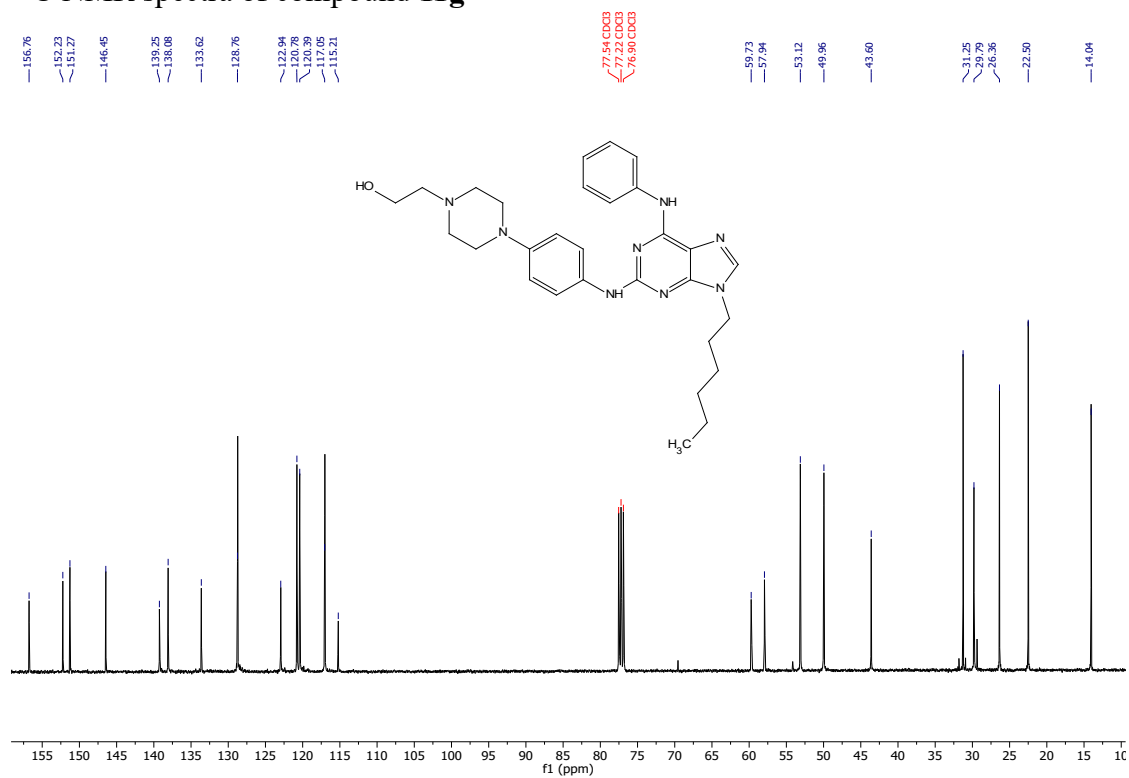

# <sup>1</sup>H NMR spectra of compound **11h**

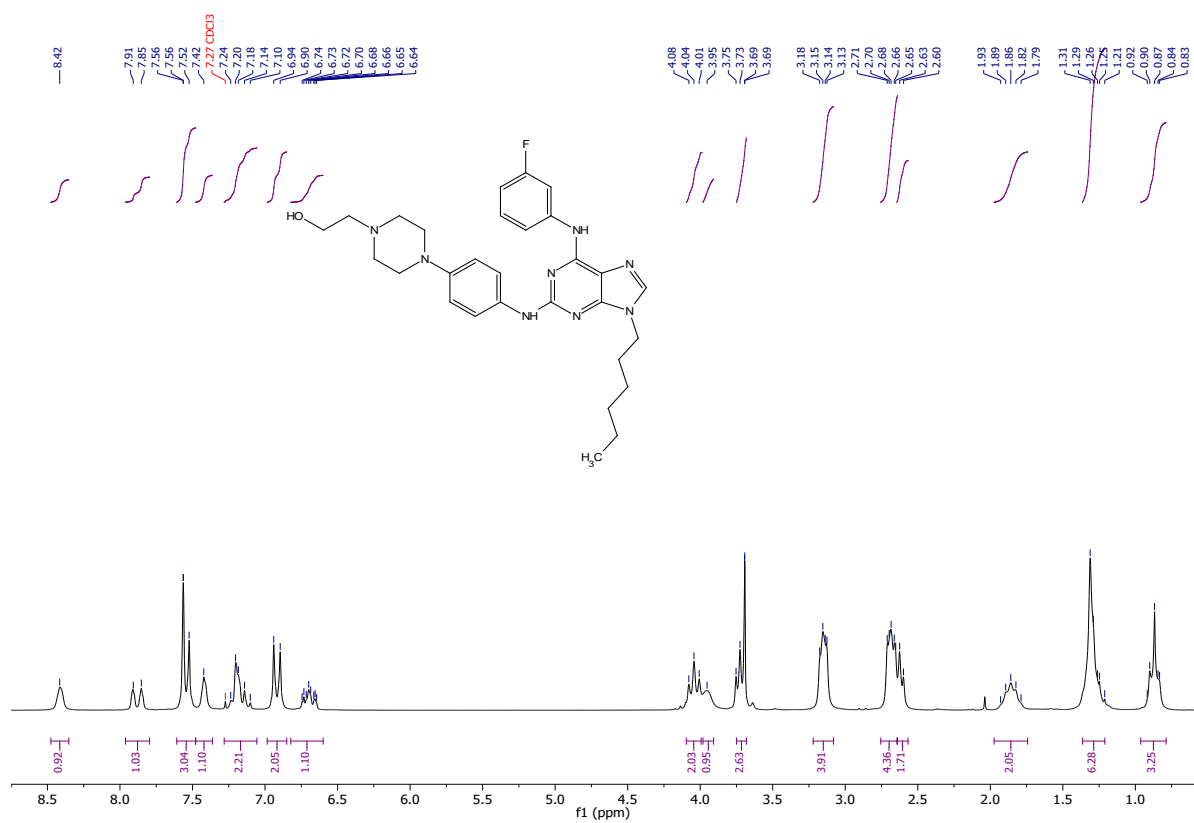

# <sup>13</sup>C NMR spectra of compound **11h**

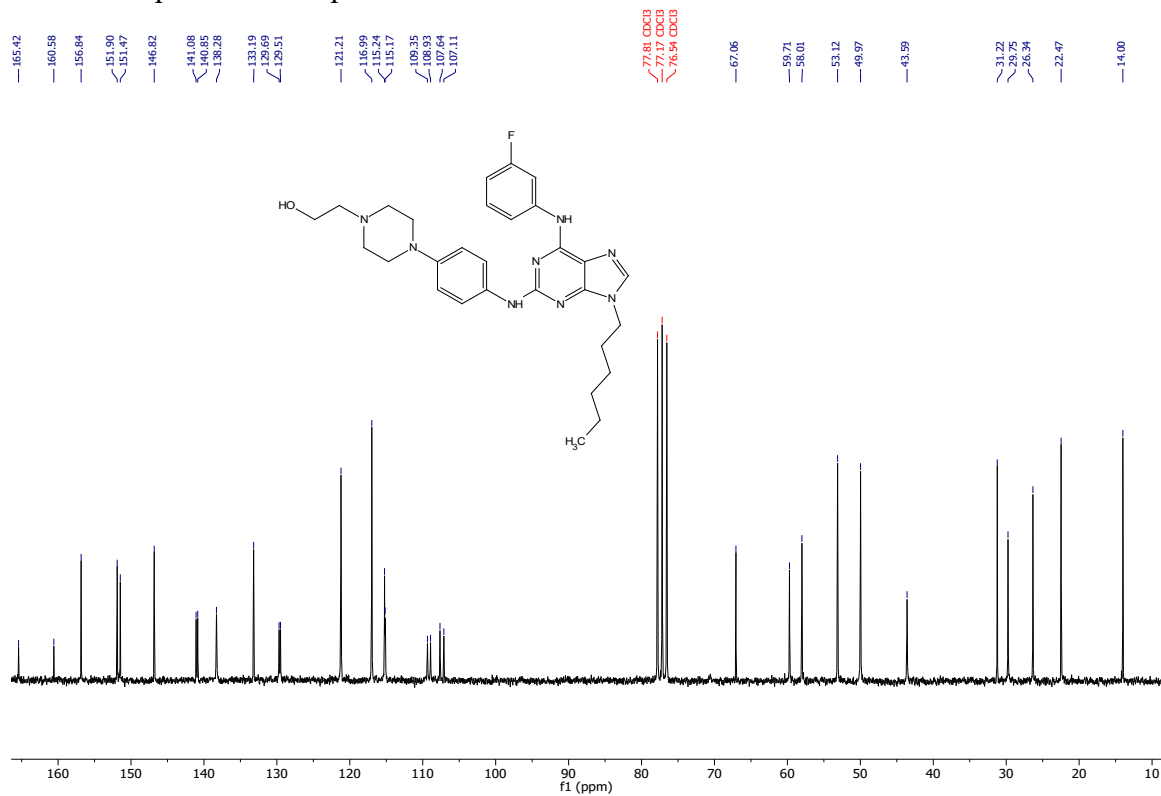

<sup>19</sup>F NMR spectra of compound **11h**

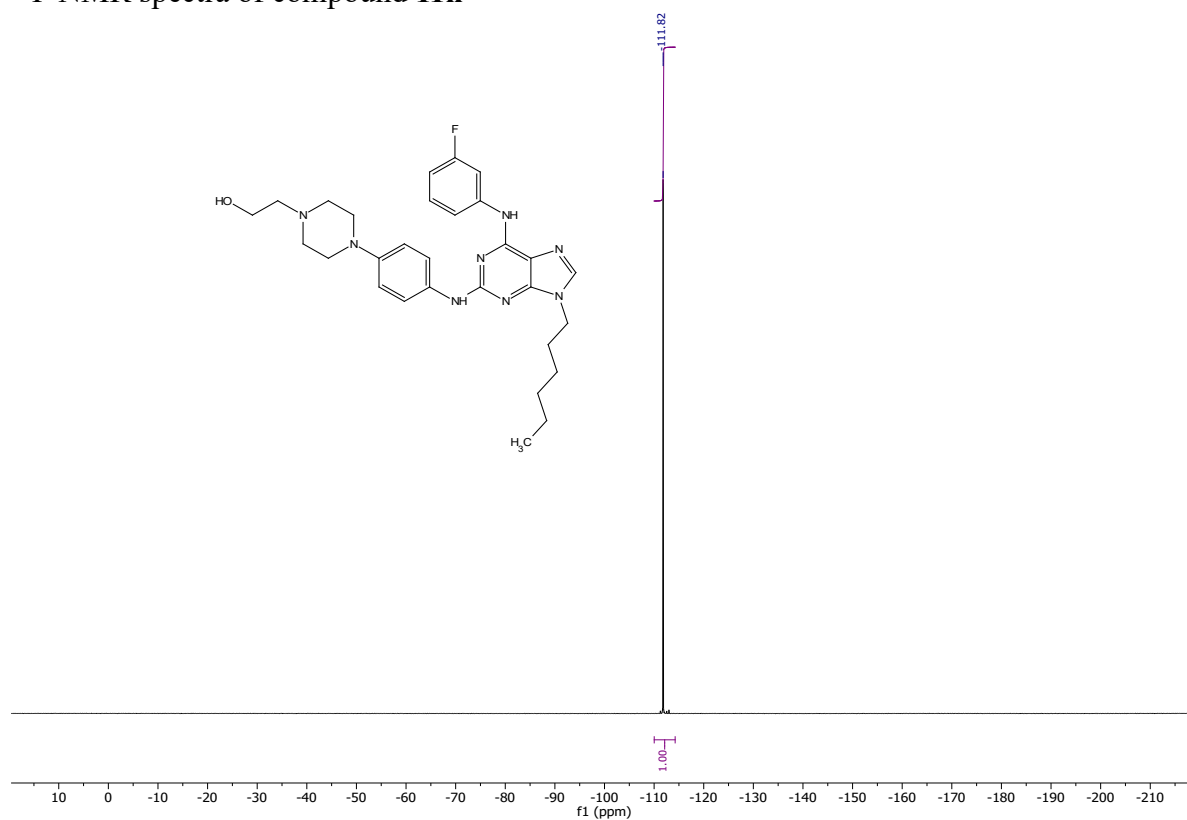

<sup>1</sup>H NMR spectra of compound **11i**

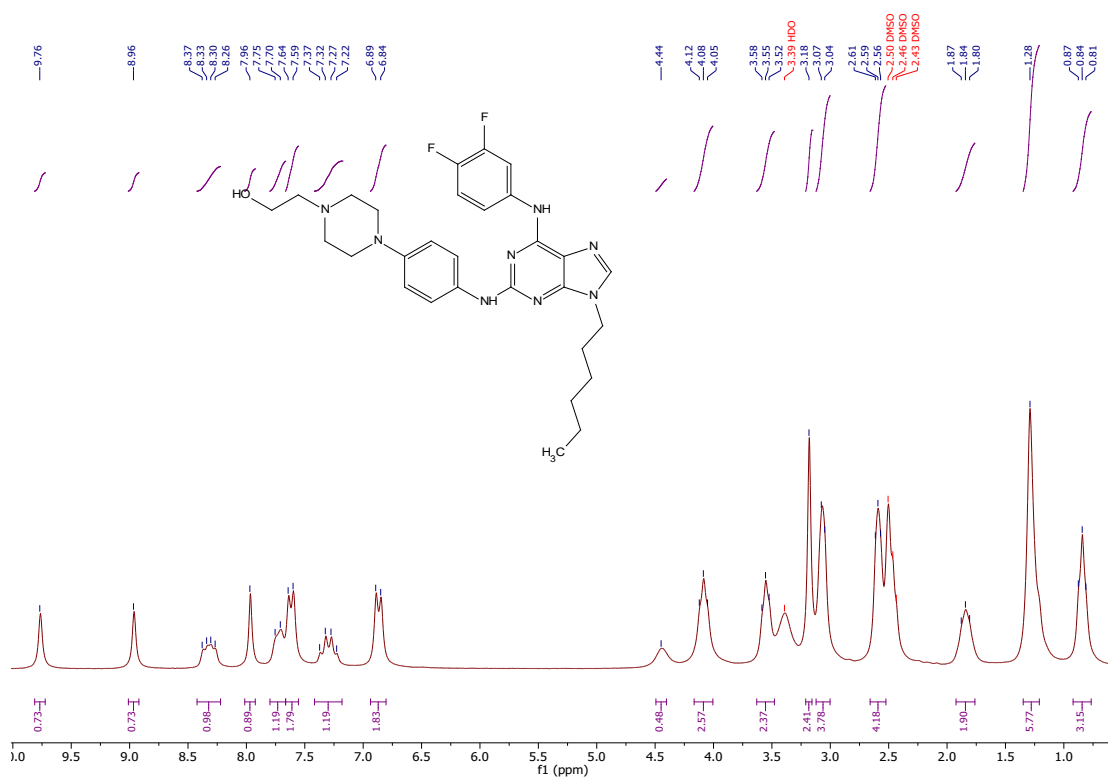

# <sup>13</sup>C NMR spectra of compound **11i**

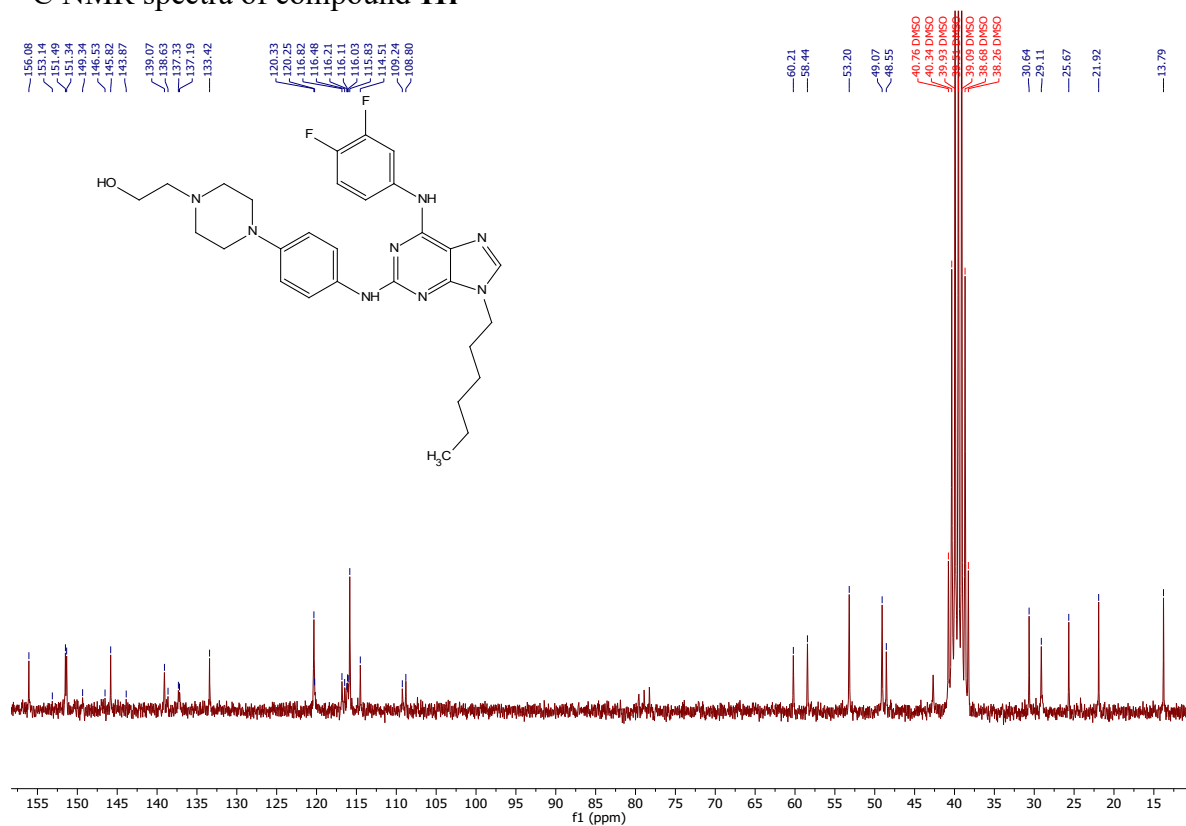

## <sup>19</sup>F NMR spectra of compound **11i**

T.Delgado-TD-15-1.4.fid

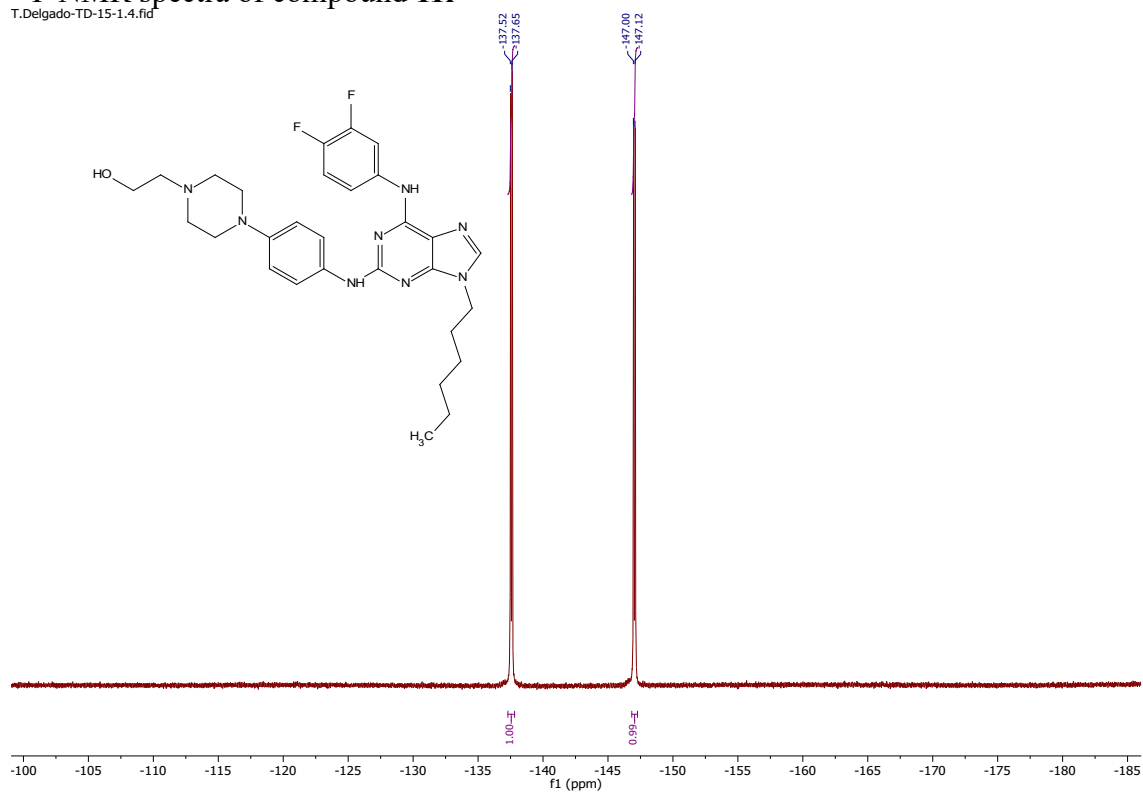



<sup>1</sup>H NMR spectra of compound **13a**

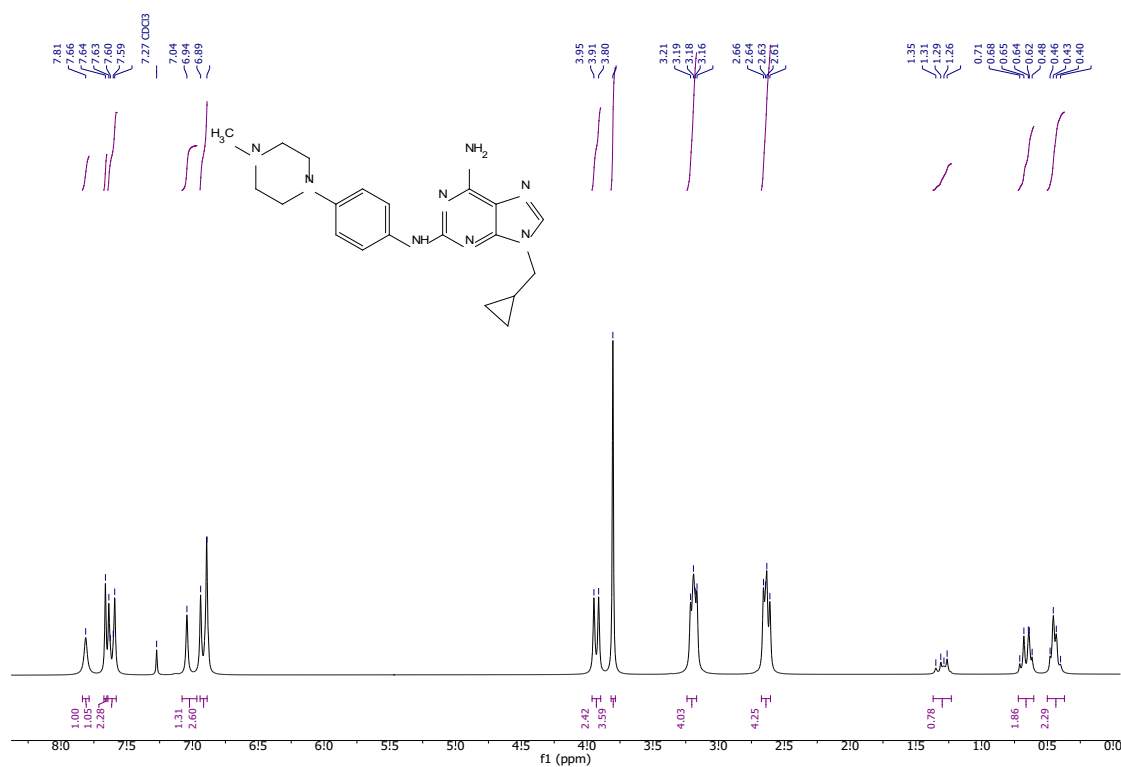

<sup>13</sup>C NMR spectra of compound **13b**

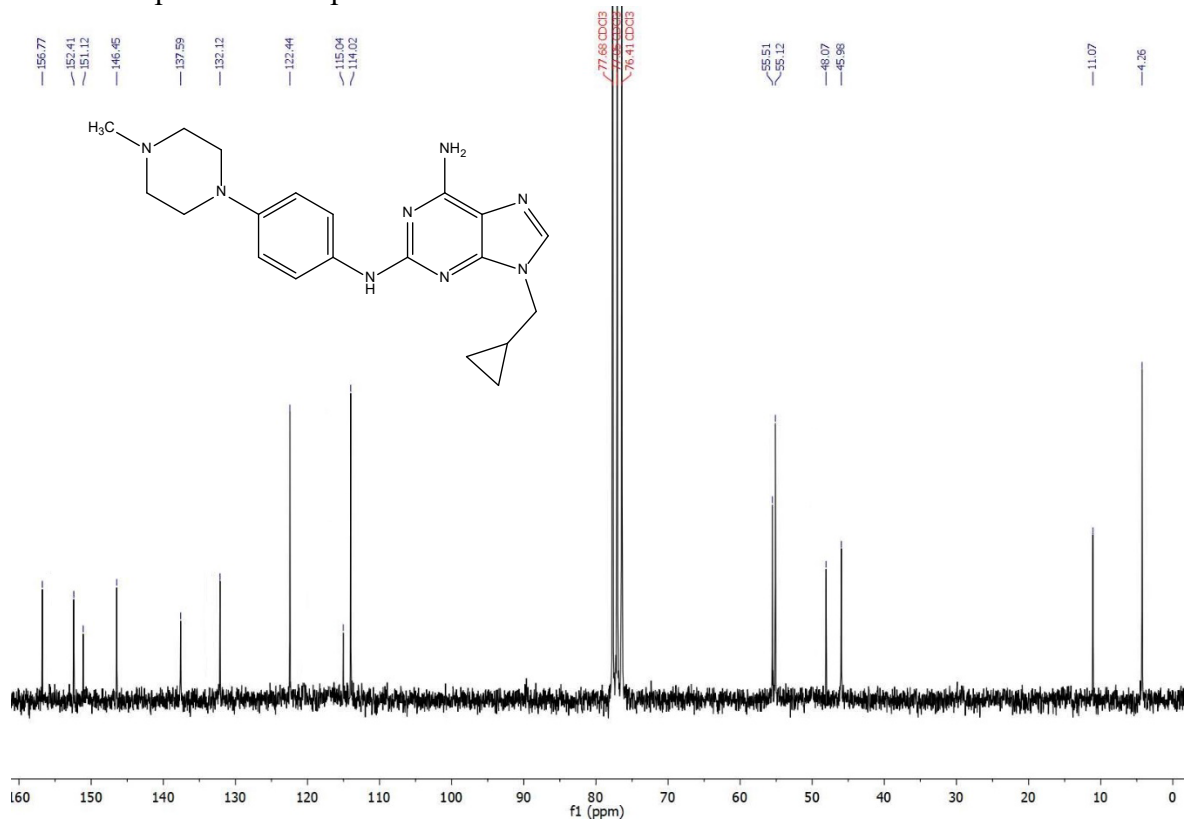

<sup>1</sup>H NMR spectra of compound **13b**

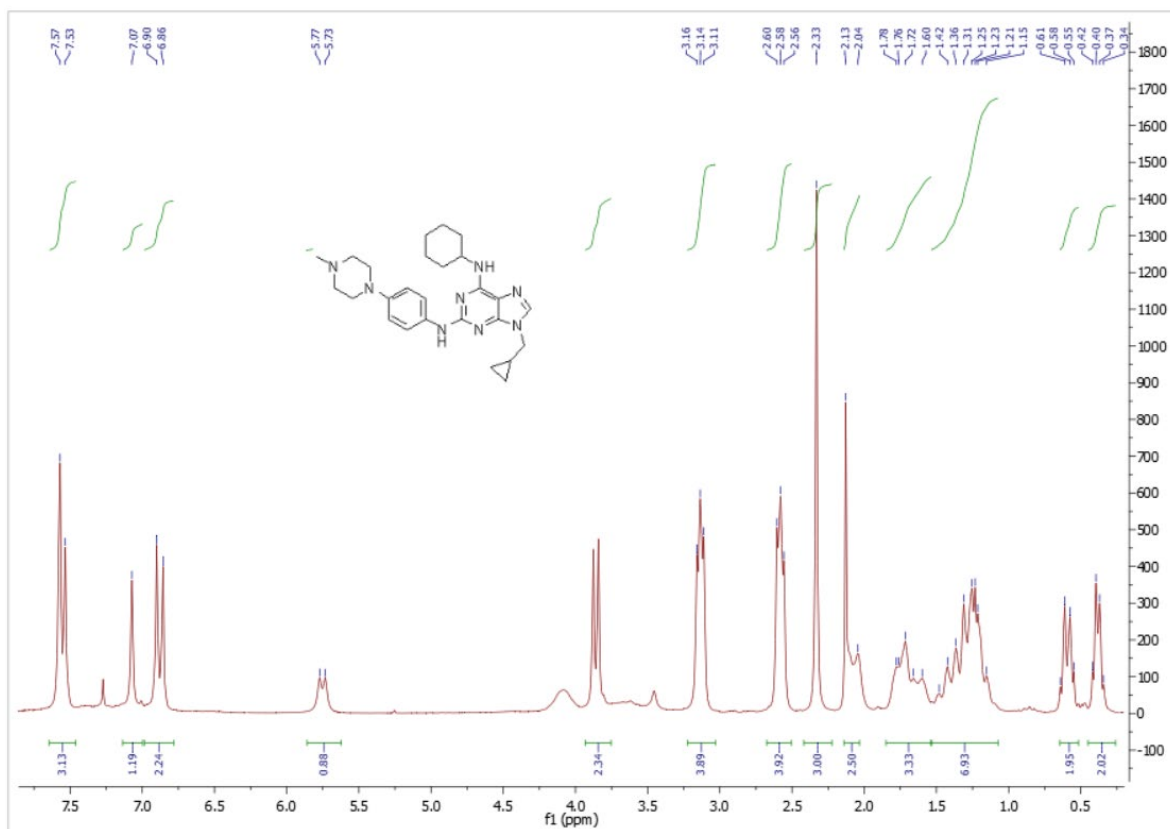

<sup>13</sup>C NMR spectra of compound **13b**

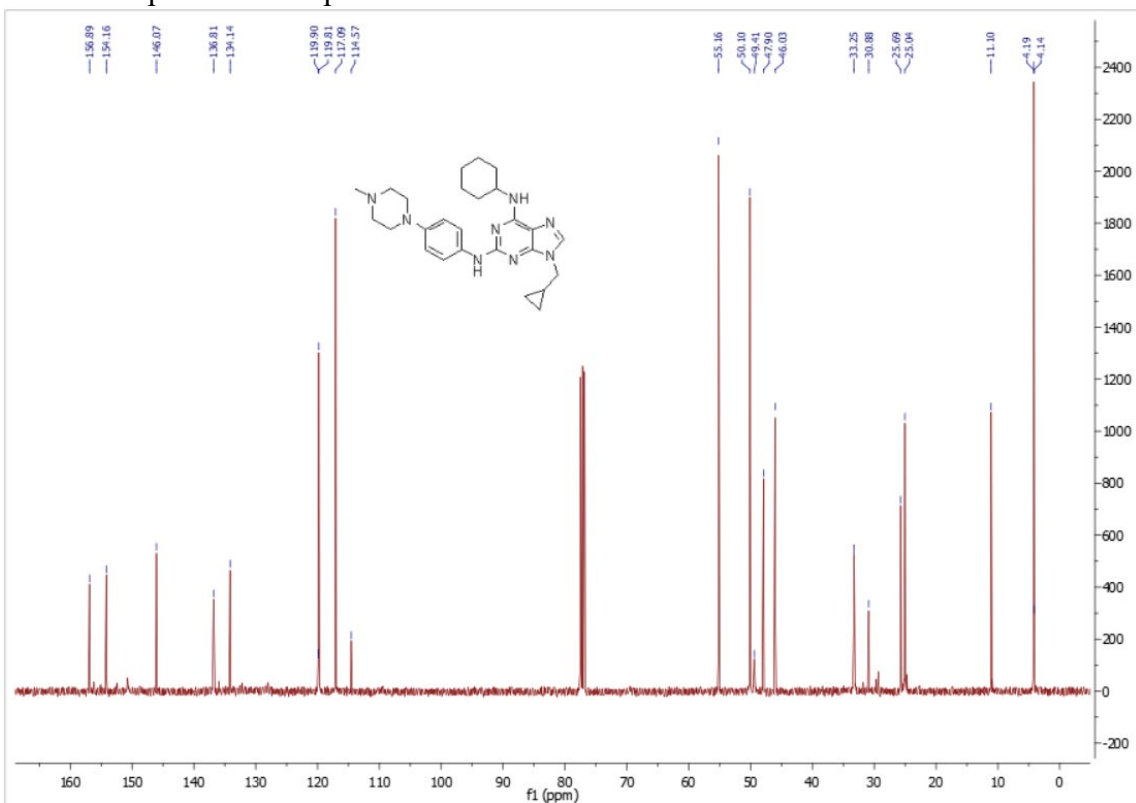

<sup>1</sup>H NMR spectra of compound **13c**

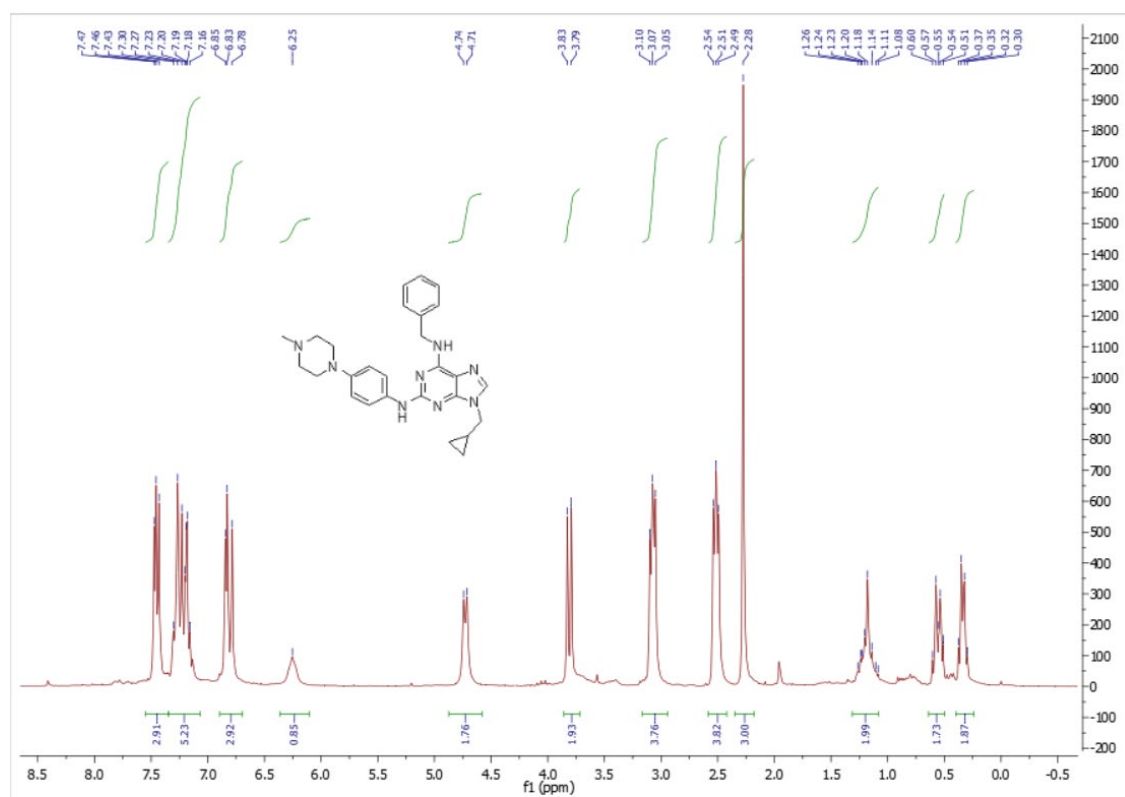

<sup>13</sup>C NMR spectra of compound **13c**

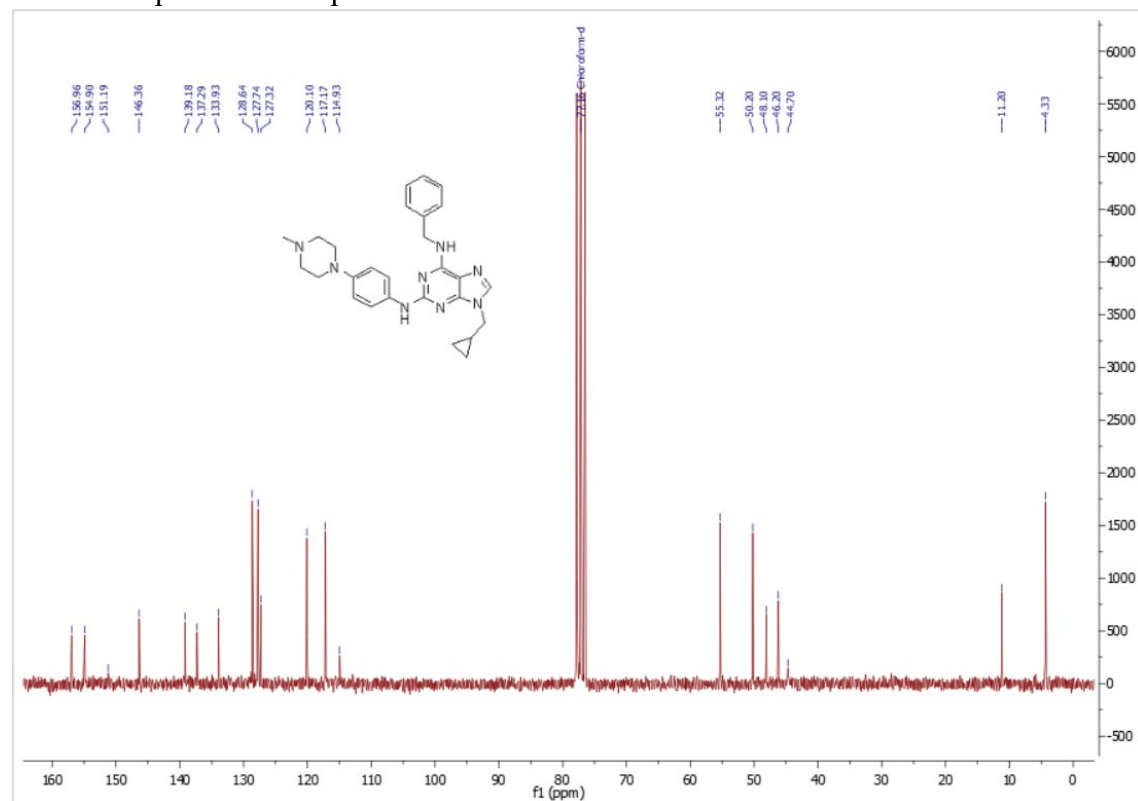

## Mass spectra of compound 7a

direct infusion latky VK

DIRVK\_8617 2 (0.050) AM (Cen,3, 70.00, Ar,5000.0,0.00,1.00); Cm (2:10)

TOF MS ES+  
1.26e6

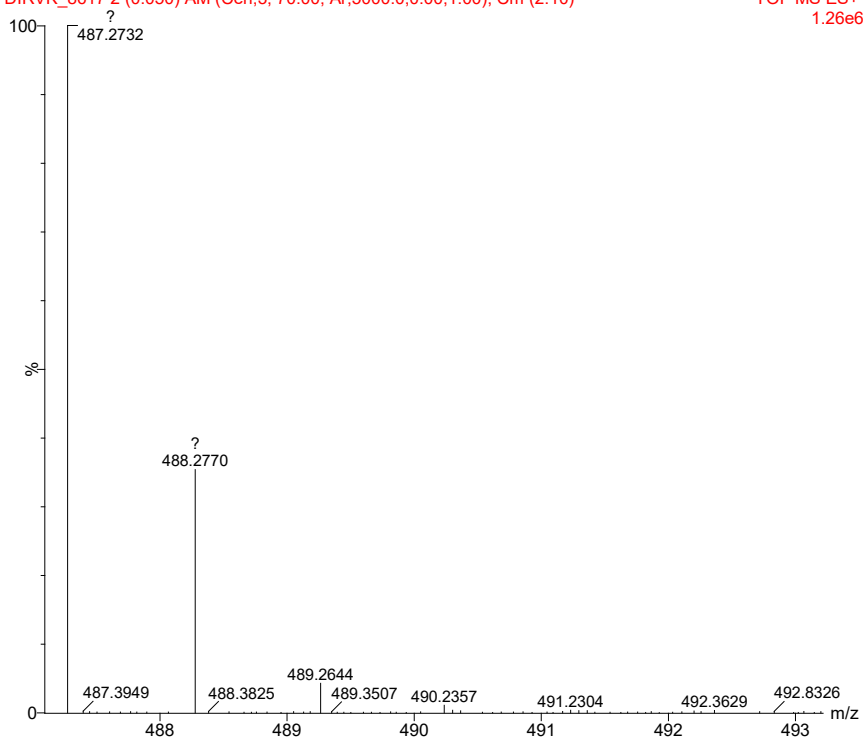

## Mass spectra of compound 7b

direct infusion latky VK

DIRVK\_8621 4 (0.084) AM (Cen,3, 70.00, Ar,5000.0,0.00,1.00); Cm (1:10)

TOF MS ES+  
3.00e6

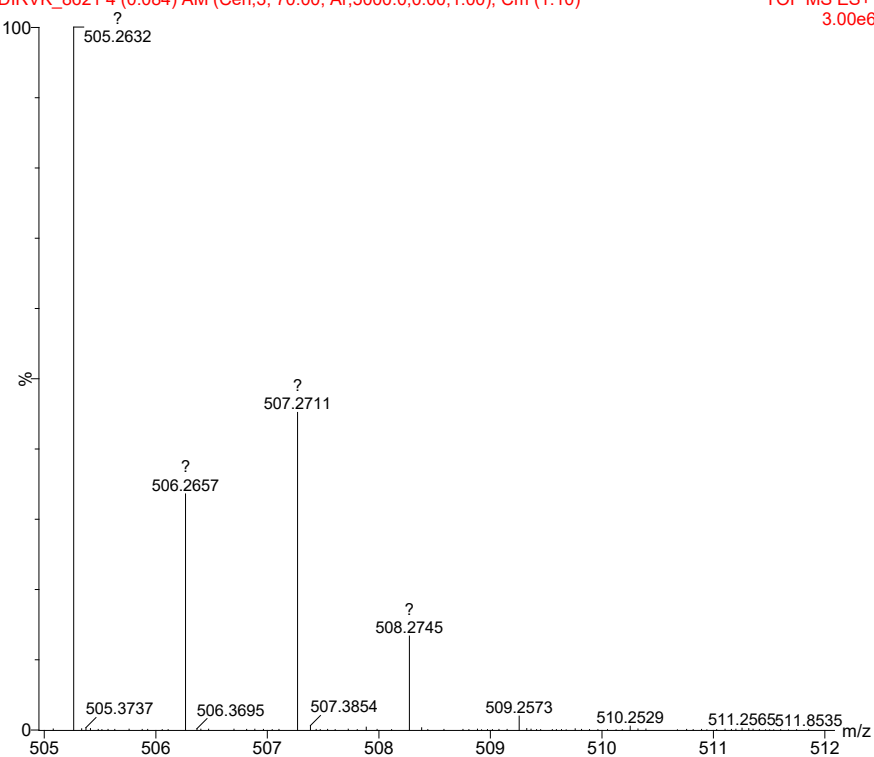

## Mass spectra of compound **11a**

direct infusion latky VK

DIRVK\_8957 3 (0.067) AM (Cen,3, 70.00, Ar,5000.0,0.00,1.00); Cm (2:10)

TOF MS ES+  
4.94e6

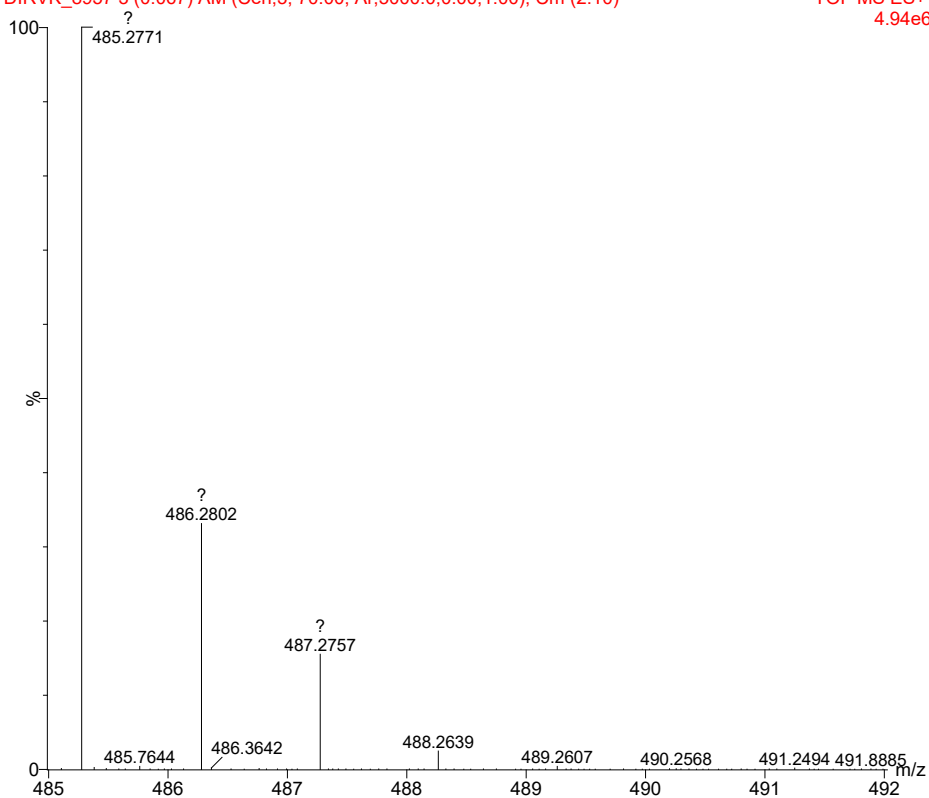

## Mass spectra of compound **11b**

direct infusion latky VK

DIRVK\_8626 2 (0.050) AM (Cen,3, 70.00, Ar,5000.0,0.00,1.00); Cm (2:10)

TOF MS ES+  
1.16e6

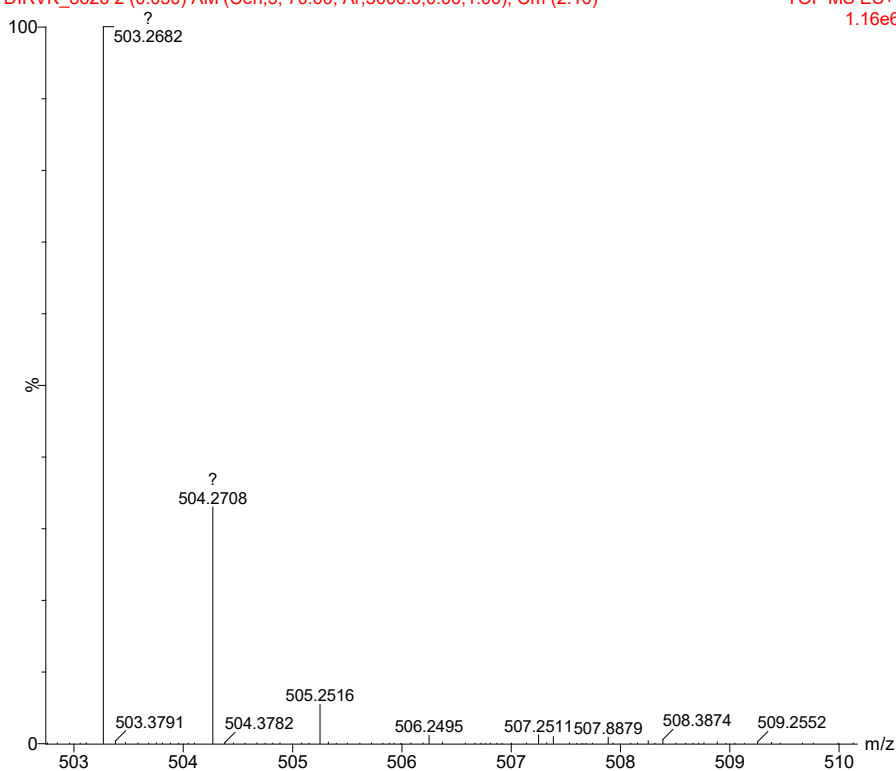

## Mass spectra of compound 11c

direct infusion latky VK

DIRVK\_8627 3 (0.067) AM (Cen,3, 70.00, Ar,5000.0,0.00,1.00); Cm (2:10)

TOF MS ES+  
6.44e6

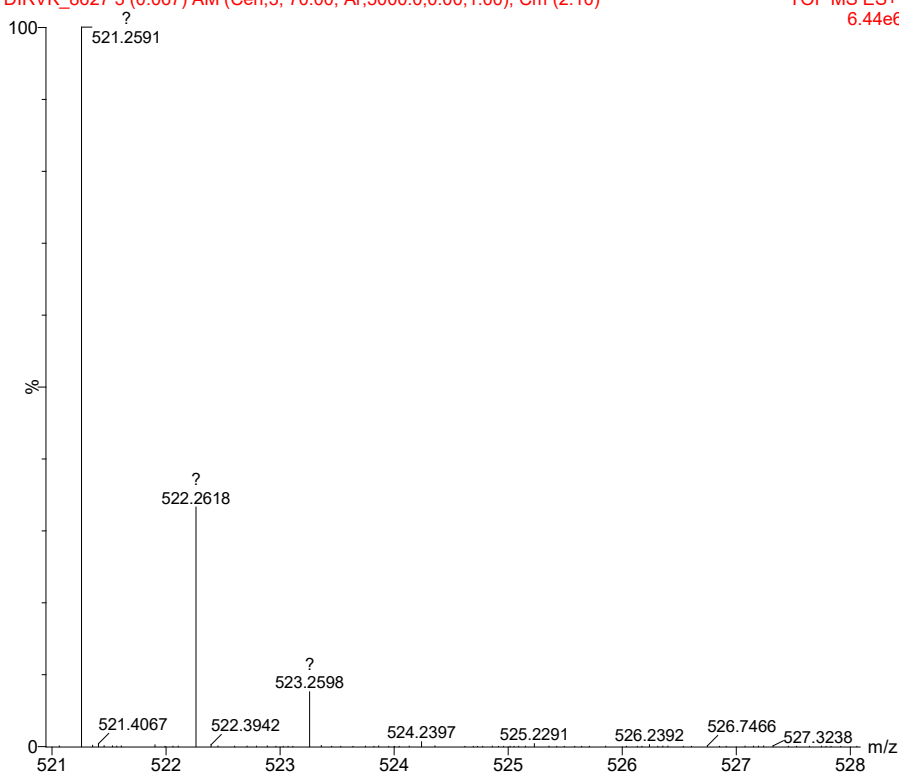

## Mass spectra of compound 11d

direct infusion latky VK

DIRVK\_9279 3 (0.067) AM (Cen,3, 70.00, Ar,5000.0,0.00,1.00); Cm (2:10)

TOF MS ES+  
7.25e6

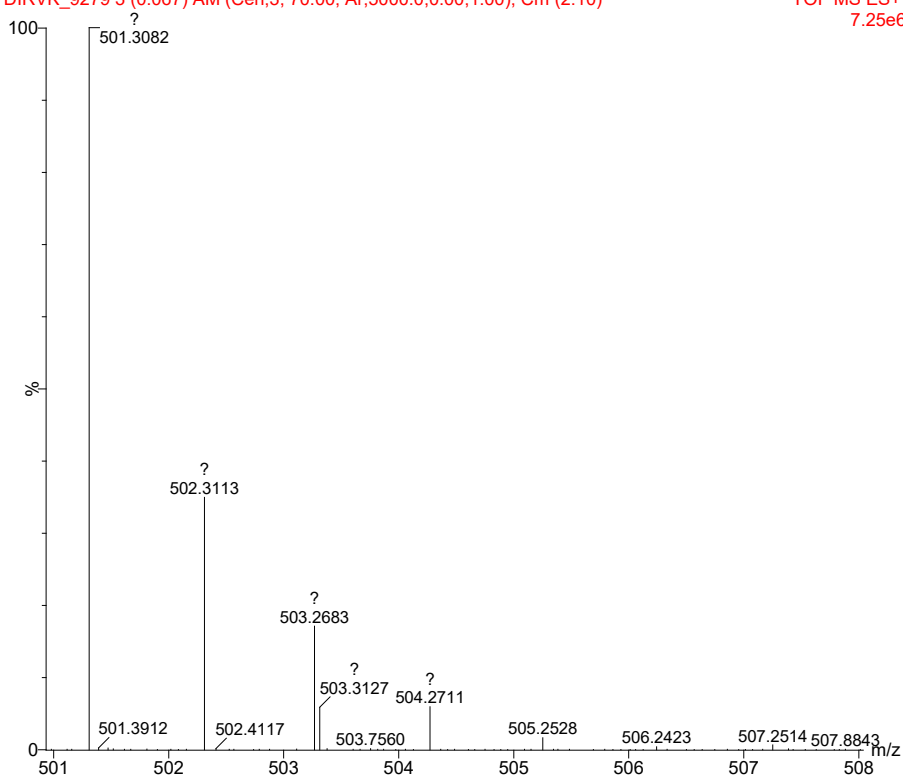

## Mass spectra of compound **11e**

direct infusion latky VK

DIRVK\_8958 3 (0.067) AM (Cen,3, 70.00, Ar,5000.0,0.00,1.00); Cm (2:10)

TOF MS ES+  
5.41e6

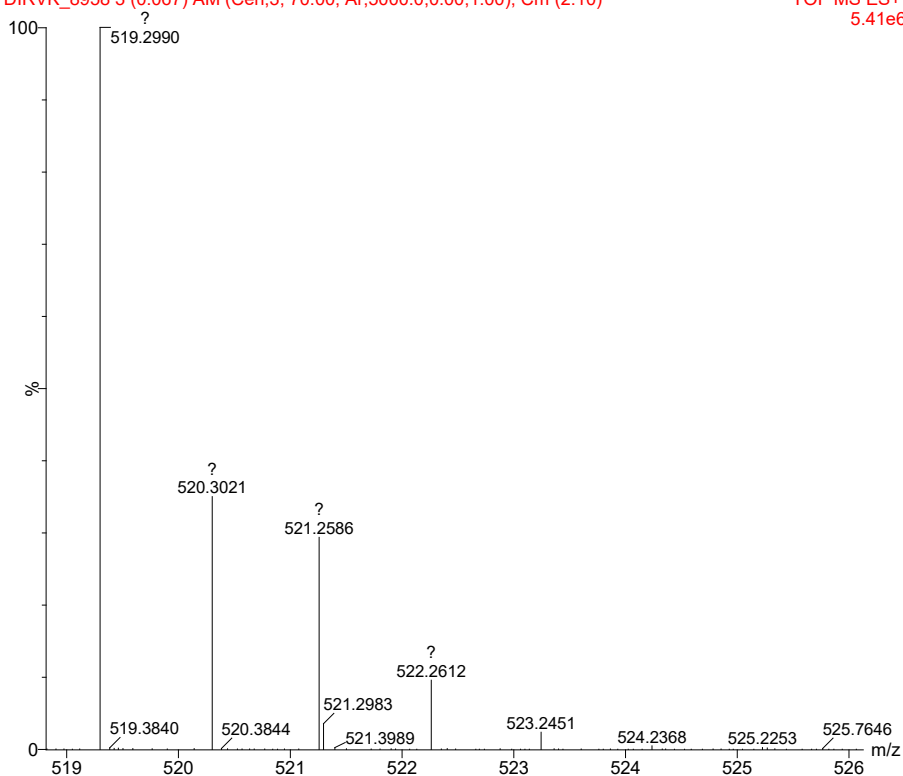

## Mass spectra of compound **11f**

direct infusion latky VK

DIRVK\_9268 4 (0.084) AM (Cen,3, 70.00, Ar,5000.0,0.00,1.00); Cm (2:10)

TOF MS ES+  
4.21e6

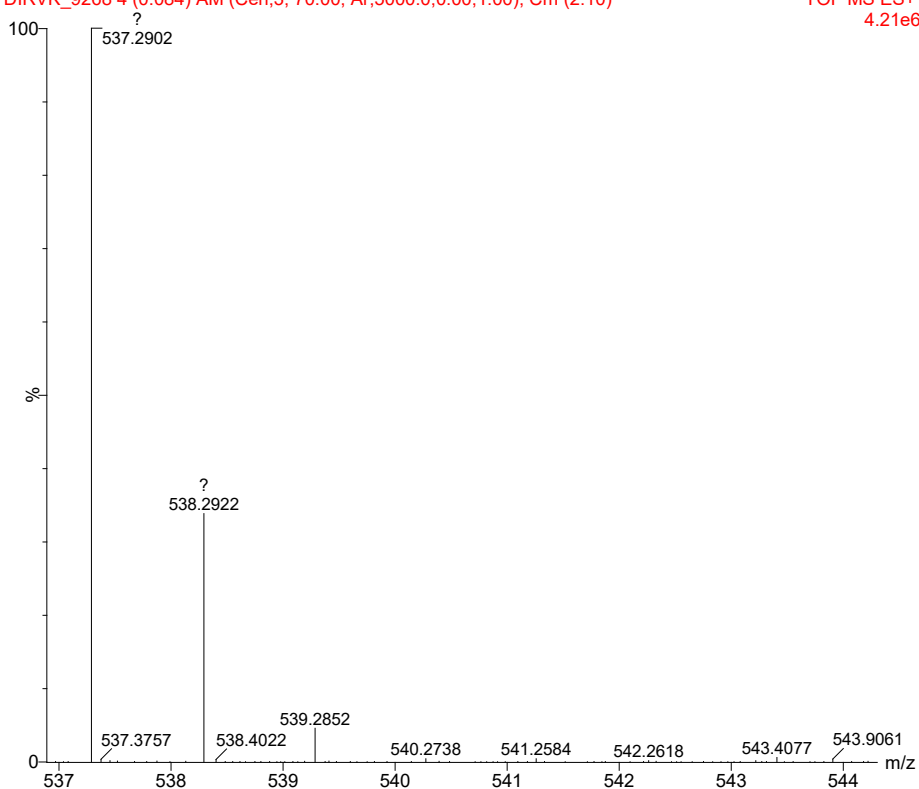

# Mass spectra of compound 11g

direct infusion latky VK

DIRVK\_8959 2 (0.050) AM (Cen,3, 70.00, Ar,5000.0,0.00,1.00); Cm (2:10)

TOF MS ES+  
4.96e6

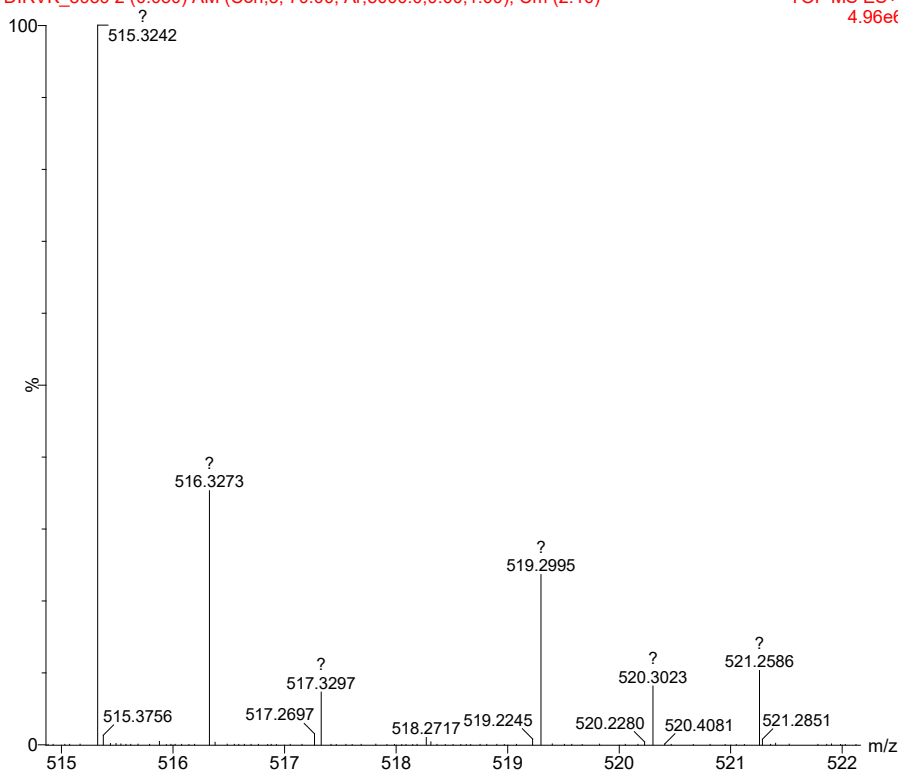

# Mass spectra of compound 11h

direct infusion latky VK

DIRVK\_8960 3 (0.067) AM (Cen,3, 70.00, Ar,5000.0,0.00,1.00); Cm (2:10)

TOF MS ES+  
1.82e6

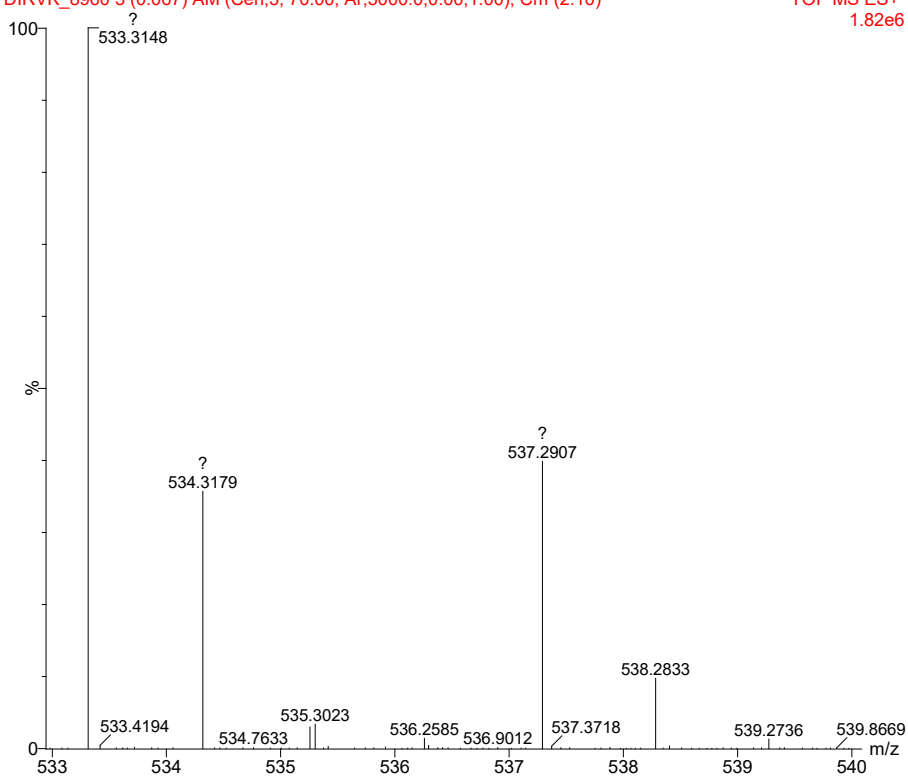



## Mass spectra of compound **11i**

direct infusion latky VK

DIRVK\_8628 2 (0.050) AM (Cen,3, 70.00, Ar,5000.0,0.00,1.00); Cm (2:10)

TOF MS ES+  
2.50e6

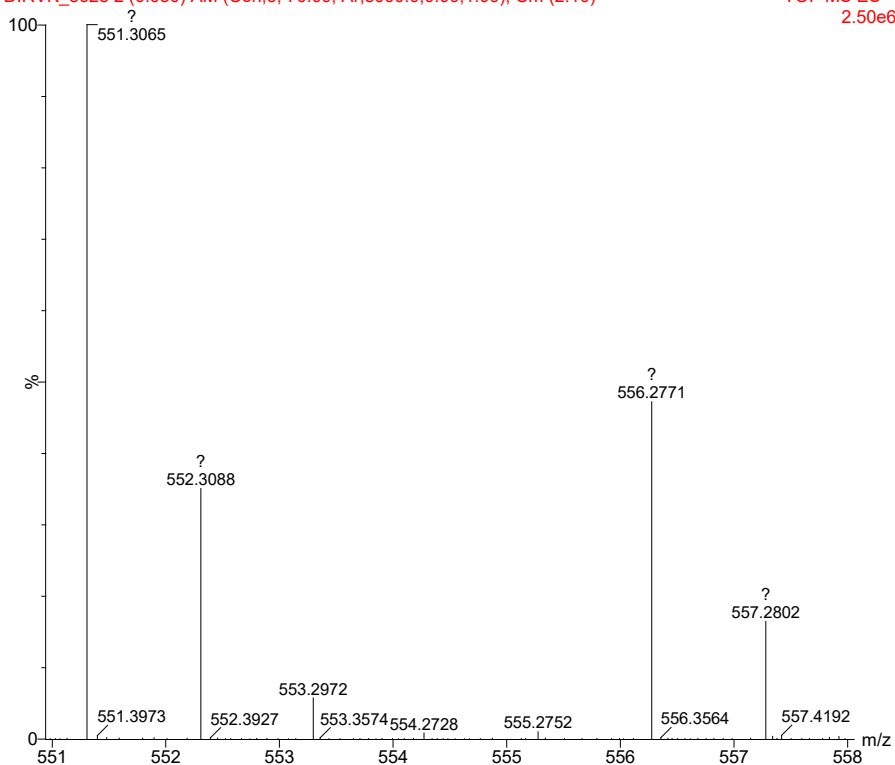

## Mass spectra of compound **13a**

direct infusion latky VK

DIRVK\_8618 4 (0.084) AM (Cen,3, 70.00, Ar,5000.0,0.00,1.00); Cm (1:9)

TOF MS ES+  
2.08e7

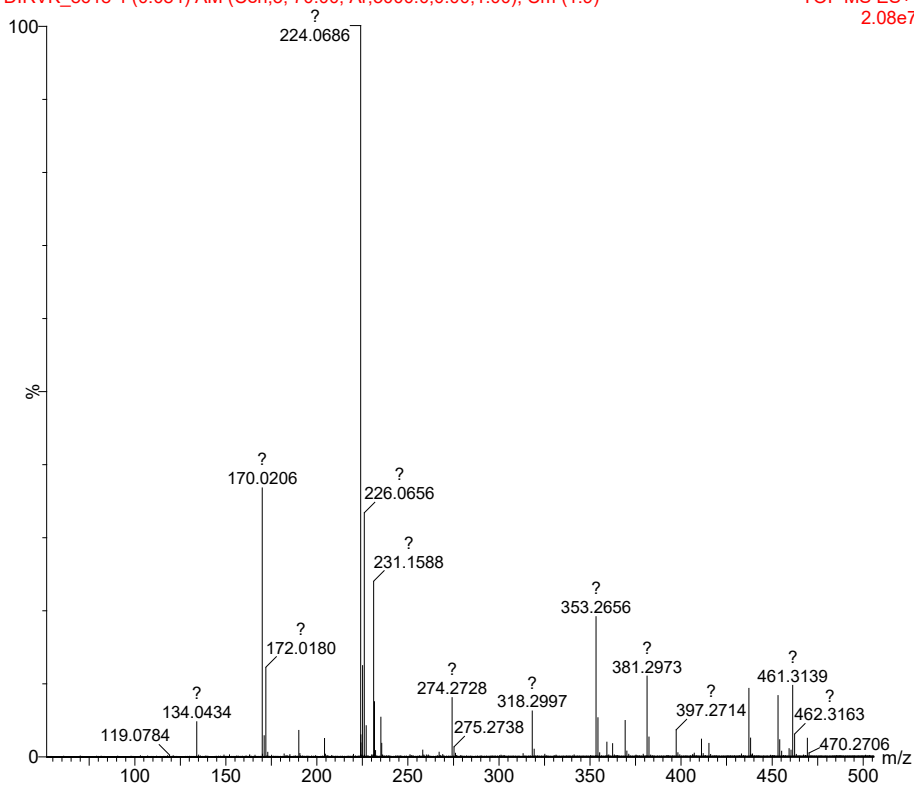

## Mass spectra of compound **13b**

direct infusion latky VK

DIRVK\_8619 2 (0.050) AM (Cen,3, 70.00, Ar,5000.0,0.00,1.00); Cm (2:10)

TOF MS ES+  
4.25e6

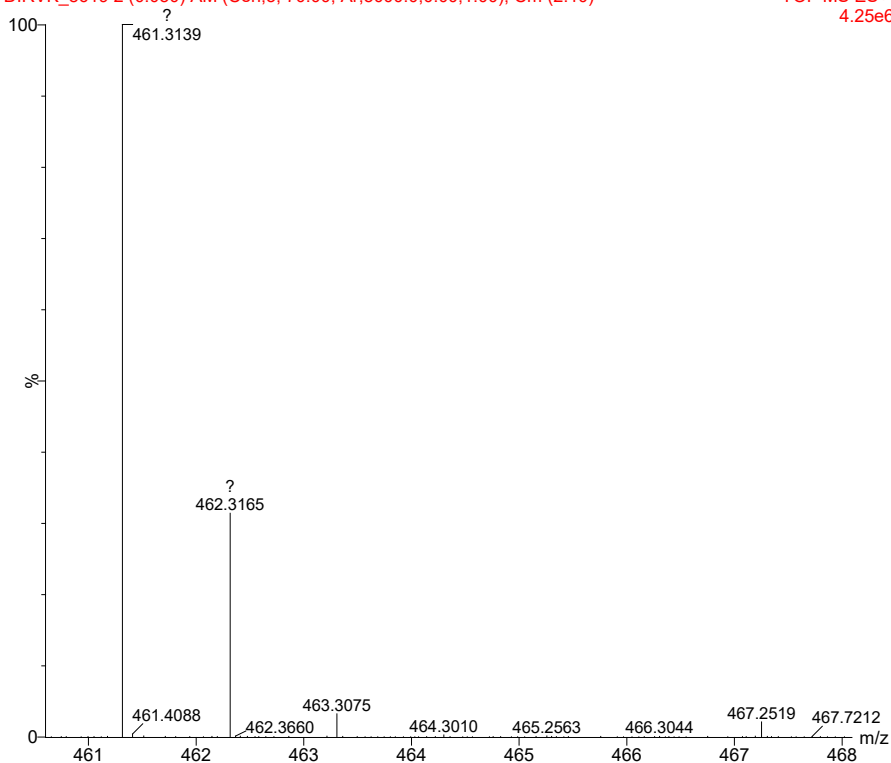

## Mass spectra of compound **13c**

direct infusion latky VK

DIRVK\_8949 1 (0.034) AM (Cen,3, 70.00, Ar,5000.0,0.00,1.00); Cm (1:9)

TOF MS ES+  
3.53e6

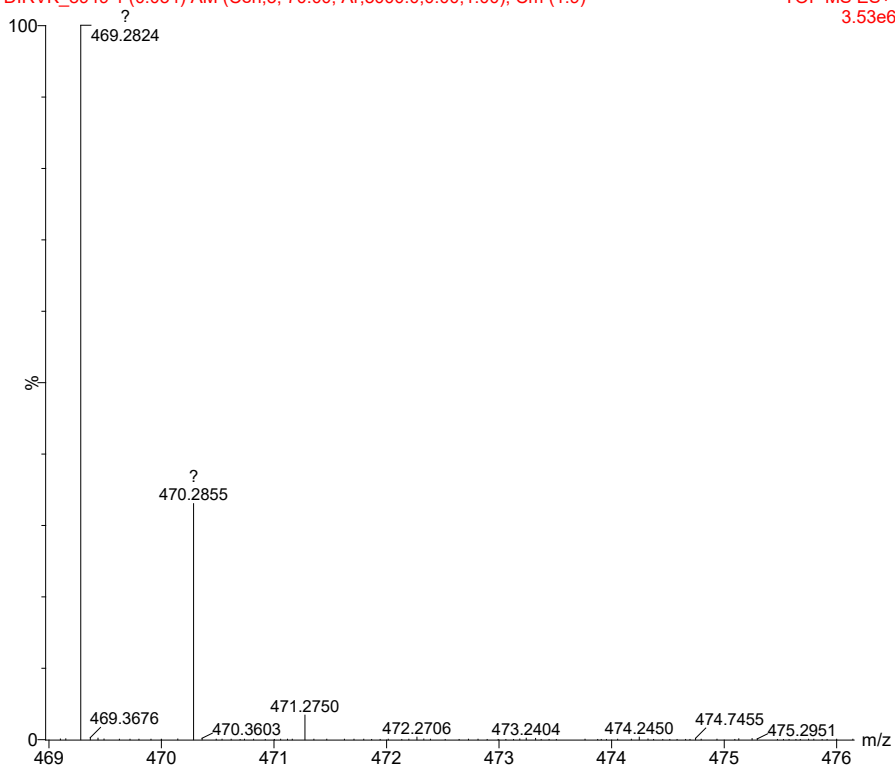

**Table S1.** Binding affinity scores (kcal/mol) of the purine derivatives with RDOCK, XP Score and MM-GBSA ( $\Delta G_{\text{bind}}$  and their respective energy contributions) in the Bcr-Abl<sup>WT</sup>.

| Compd.             | IC <sub>50</sub> | pIC <sub>50</sub> | RDOCK  | XP Score | $\Delta G_{\text{Bind}}$ | $\Delta G_{\text{Coul.}}$ | $\Delta G_{\text{Hbond}}$ | $\Delta G_{\text{Lipo}}$ | $\Delta G_{\text{Packing}}$ | $\Delta G_{\text{Solv\_GB}}$ | $\Delta G_{\text{vdW}}$ |
|--------------------|------------------|-------------------|--------|----------|--------------------------|---------------------------|---------------------------|--------------------------|-----------------------------|------------------------------|-------------------------|
| <b>7b</b>          | 0.220            | 6.658             | -15.66 | -8.51    | -64.21                   | -15.29                    | -1.16                     | -22.94                   | -0.79                       | 26.87                        | -56.66                  |
| <b>7a</b>          | 0.180            | 6.745             | -14.38 | -9.16    | -59.92                   | -40.76                    | -1.37                     | -21.14                   | -1.48                       | 51.6                         | -59.46                  |
| <b>13c</b>         | 0.840            | 6.076             | -15.31 | -7.74    | -50.43                   | -15.57                    | -1.69                     | -19.3                    | -1.05                       | 26.14                        | -51.97                  |
| <b>13b</b>         | 11.050           | 4.957             | -14.22 | -7.57    | -51.13                   | -41.41                    | -1.76                     | -17.41                   | -1.07                       | 47.1                         | -45.27                  |
| <b>13a</b>         | 3.950            | 5.403             | -13.94 | -7.51    | -48.57                   | -8.79                     | -1.3                      | -16.44                   | -0.59                       | 15.37                        | -47.62                  |
| <b>11i</b>         | 1.680            | 5.775             | -15.15 | -6.91    | -55.34                   | -3.88                     | -2.29                     | -29.12                   | -0.66                       | 19.24                        | -51.52                  |
| <b>11h</b>         | 0.670            | 6.174             | -15.39 | -7.33    | -53.75                   | -10.36                    | -1.54                     | -20.23                   | -0.75                       | 20.36                        | -50.32                  |
| <b>11g</b>         | 0.830            | 6.081             | -13.19 | -7.25    | -52.36                   | -9.56                     | -1.47                     | -19.50                   | -0.70                       | 20.50                        | -49.50                  |
| <b>11f</b>         | 1.760            | 5.754             | -17.66 | -8.57    | -66.75                   | -18.34                    | -2.44                     | -24.09                   | -1.59                       | 31.97                        | -53.41                  |
| <b>11e</b>         | 0.130            | 6.886             | -17.33 | -8.40    | -65.32                   | -17.65                    | -2.30                     | -23.31                   | -1.47                       | 30.23                        | -52.14                  |
| <b>11d</b>         | 1.240            | 5.907             | -16.84 | -8.20    | -60.11                   | -16.48                    | -2.01                     | -22.32                   | -1.40                       | 28.06                        | -51.04                  |
| <b>11c</b>         | 0.019            | 7.721             | -19.04 | -9.11    | -74.32                   | -23.49                    | -2.7                      | -20.95                   | -0.89                       | 24.31                        | -54.69                  |
| <b>11b</b>         | 0.014            | 7.854             | -20.69 | -9.36    | -73.34                   | -24.39                    | -2.69                     | -20.92                   | -0.89                       | 26.22                        | -54.71                  |
| <b>11a</b>         | 0.037            | 7.432             | -17.49 | -9.23    | -71.06                   | -26.33                    | -3.07                     | -21.6                    | -1.16                       | 29.25                        | -57.85                  |
| <b>I</b>           | 0.090            | 7.046             | -15.19 | -8.54    | -57.16                   | -43.55                    | -1.24                     | -20.24                   | -1.23                       | 48.37                        | -47.55                  |
| <b>II</b>          | 0.040            | 7.398             | -16.91 | -8.83    | -60.04                   | -37.06                    | -0.83                     | -21.32                   | -1.53                       | 45.94                        | -55.10                  |
| <b>III</b>         | 0.040            | 7.398             | -16.54 | -9.57    | -59.74                   | -39.82                    | -1.19                     | -20.50                   | -1.24                       | 42.57                        | -49.56                  |
| <b>Purvalanol*</b> | —                | —                 | -31.45 | -9.60    | -69.69                   | -18.25                    | -1.90                     | -18.51                   | -1.46                       | 15.06                        | -46.15                  |
| <b>Dasatinib**</b> | 0.00014          | 9.854             | —      | -13.91   | -87.55                   | -36.72                    | -2.12                     | -25.85                   | 0.92                        | 43.96                        | -58.09                  |

$\Delta G_{\text{Bind}}$  = Binding free energy

$\Delta G_{\text{Coul}}$  = Coulomb energy

$\Delta G_{\text{Hbond}}$  = Hydrogen bonding correction

$\Delta G_{\text{Lipo}}$  = Lipophilic energy

$\Delta G_{\text{Packing}}$  = Pi-pi packing correction

$\Delta G_{\text{Solv\_GB}}$  = Generalized Born electrostatic solvation energy

$\Delta G_{\text{vdW}}$  = van der Waals energy

$\Delta G_{\text{Bind}}$  = Binding free energy

\*Docking score calculated with RDOCK, PDB: 6BL8

\*\*Docking score calculated with PDB 2GQG

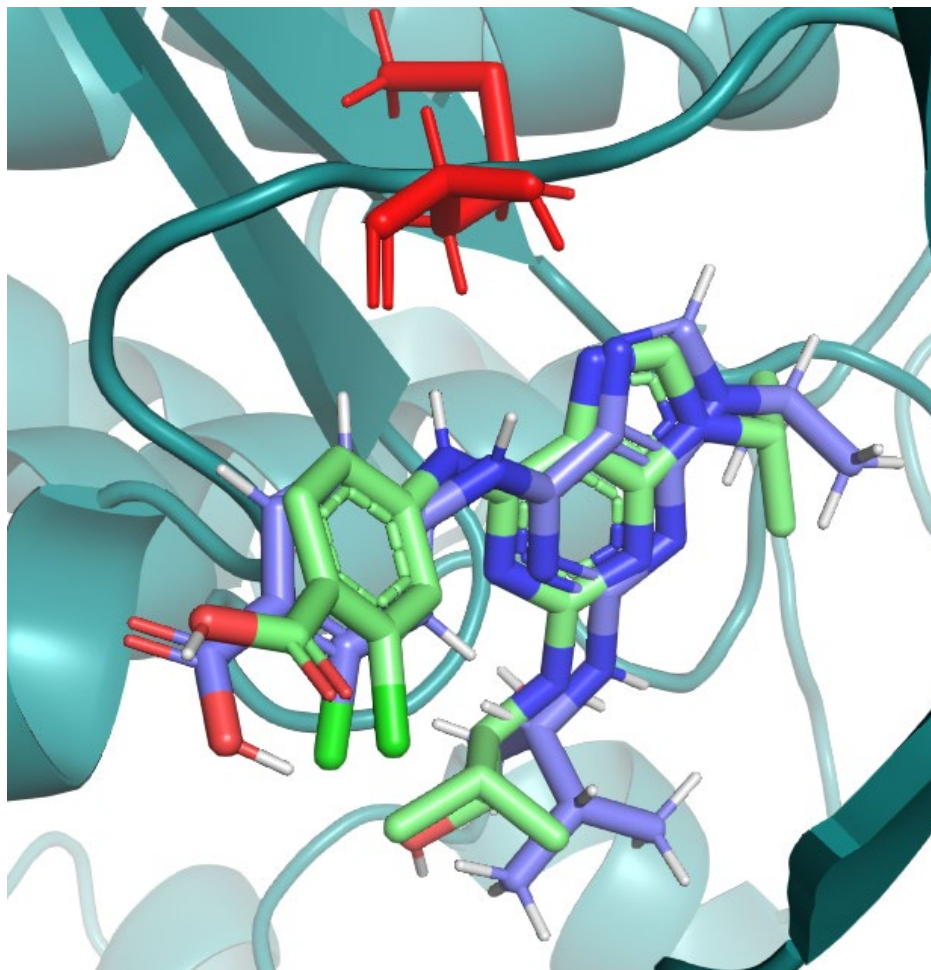

**Figure S1.** Co-crystallized ligand, purvalanol, in the Bcr-Abl binding site. Its experimentally determined binding mode is shown in blue, while the docking pose of purvalanol from our self-docking protocol is shown in green.

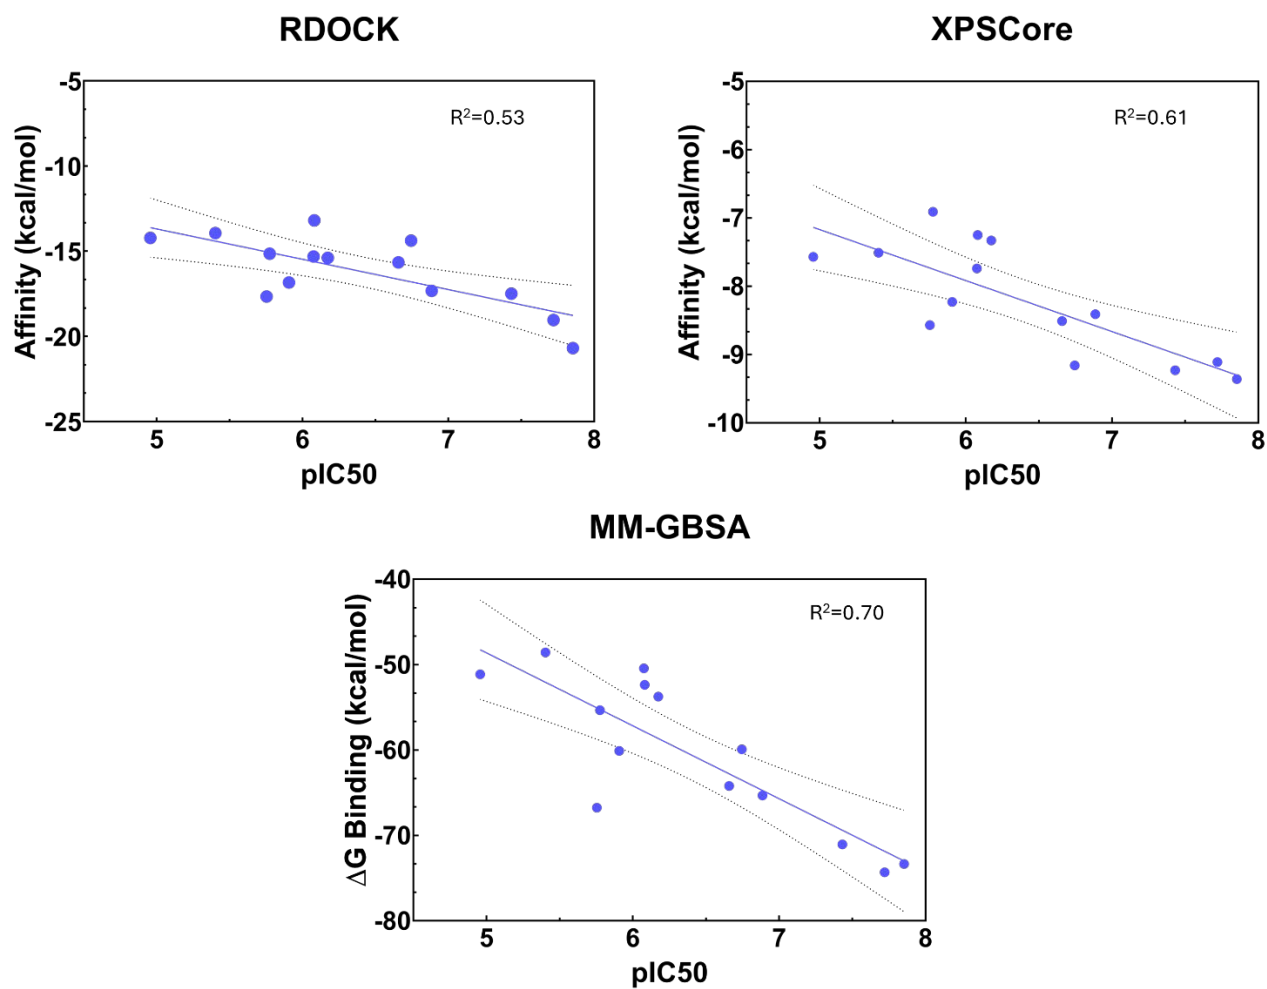

**Figure S2.** Correlation plot between biological activity in pIC<sub>50</sub> and affinity energies achieved with RDOCK, Glide (XP Score) and MM-GBSA of the synthesised compounds.

| T315I (100%)<br>KCL22B8 GI50 |      |          |         |
|------------------------------|------|----------|---------|
| Comp.                        | (uM) | SP Score | MM-GBSA |
| 11c                          | 9.06 | -11.14   | -65.17  |
| 11d                          | 7.83 | -11.48   | -69.82  |
| 11e                          | 6.91 | -12.18   | -71.67  |
| 11f                          | 7.20 | -12.12   | -70.14  |

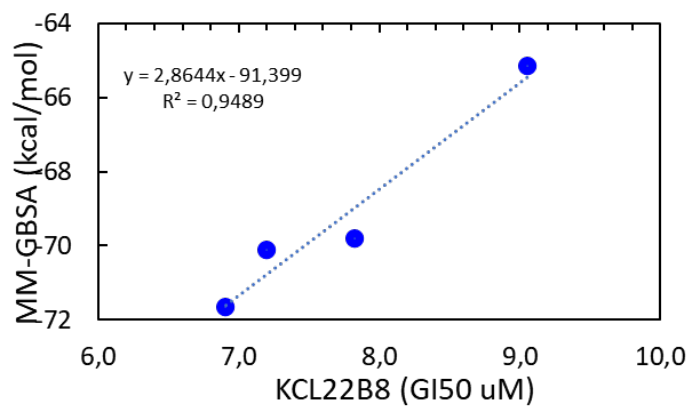

**Figure S3.** Correlation plot between biological activity in pGI<sub>50</sub> values on B8 cells and affinity energies achieved with MM-GBSA of the selected compounds.

**Figure S4.** Histograms of flow cytometry of selected compounds on KCL cells and their subclones.

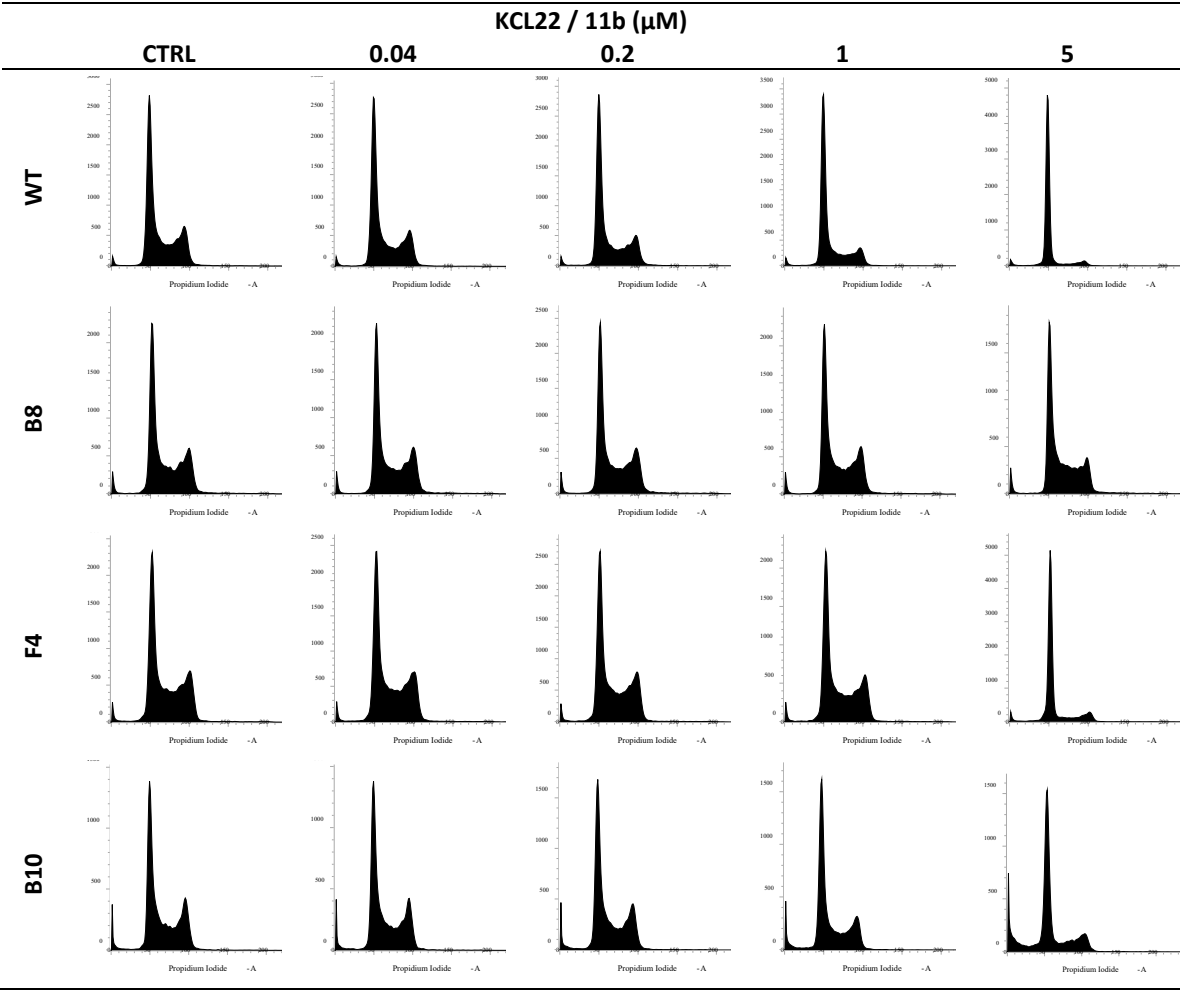

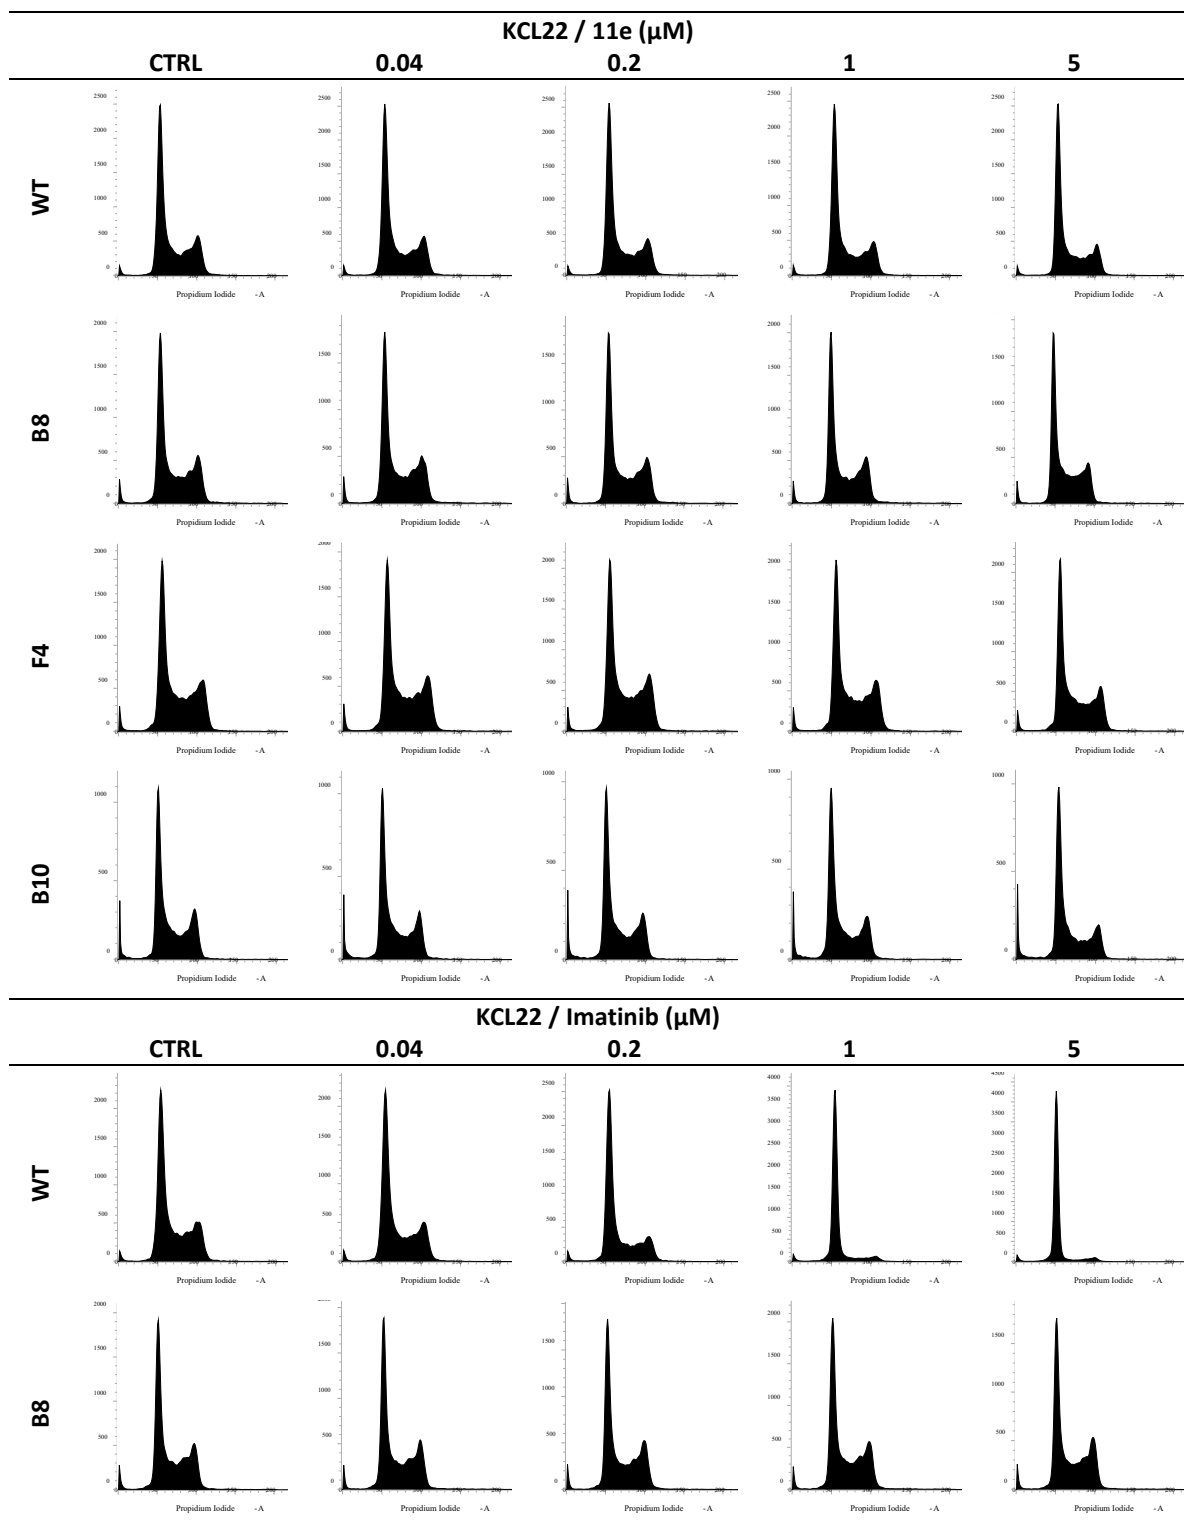



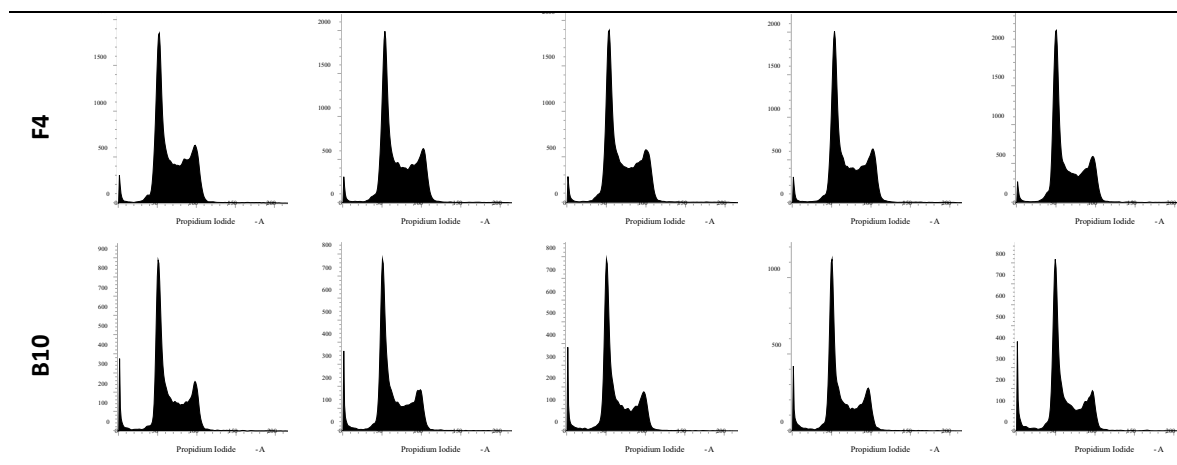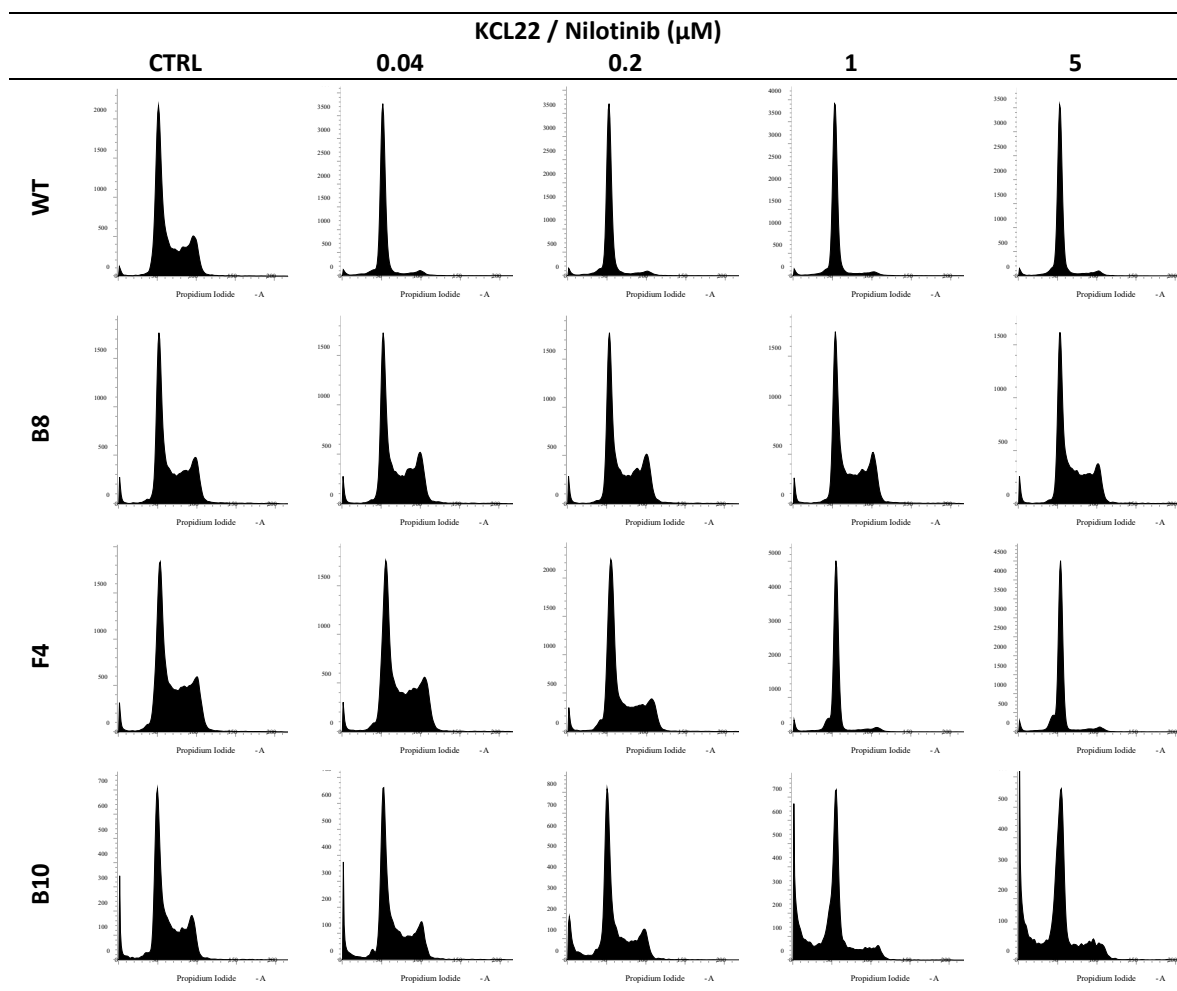

Supplement: s1 [file s1]
